# Supplementary material for: Chemotaxonomic Classification of Peucedanum japonicum and Its Chemical Correlation with Peucedanum praeruptorum, Angelica decursiva, and Saposhnikovia divaricata by Liquid Chromatography Combined with Chemometrics
Source: MDPI journal article supplement (doi:10.3390/molecules27051675), 2022-03-03
Supplement: s1 [file s1]

# Chemotaxonomic Classification of *Peucedanum japonicum* and Its Chemical Correlation with *Peucedanum praeruptorum*, *Angelica decursiva*, and *Saposhnikovia divaricata* by Liquid Chromatography Combined with Chemometrics

Jung-Hoon Kim <sup>1,†</sup>, Eui-Jeong Doh <sup>2,†</sup> and Guemsan Lee <sup>2,3,\*</sup>

<sup>1</sup> Division of Pharmacology, School of Korean Medicine, Pusan National University, Yangsan 50612, Korea;

kmsct@pusan.ac.kr

<sup>2</sup> Research Center of Traditional Korean Medicine, Wonkwang University, Iksan 54538, Korea;

bluemoon-lion@hanmail.net

<sup>3</sup> Department of Herbology, College of Korean Medicine, Wonkwang University, Iksan 54538, Korea

\* Correspondence: rasfin@wku.ac.kr; Tel.: +82-63-850-6985

† These authors contributed equally to this work.

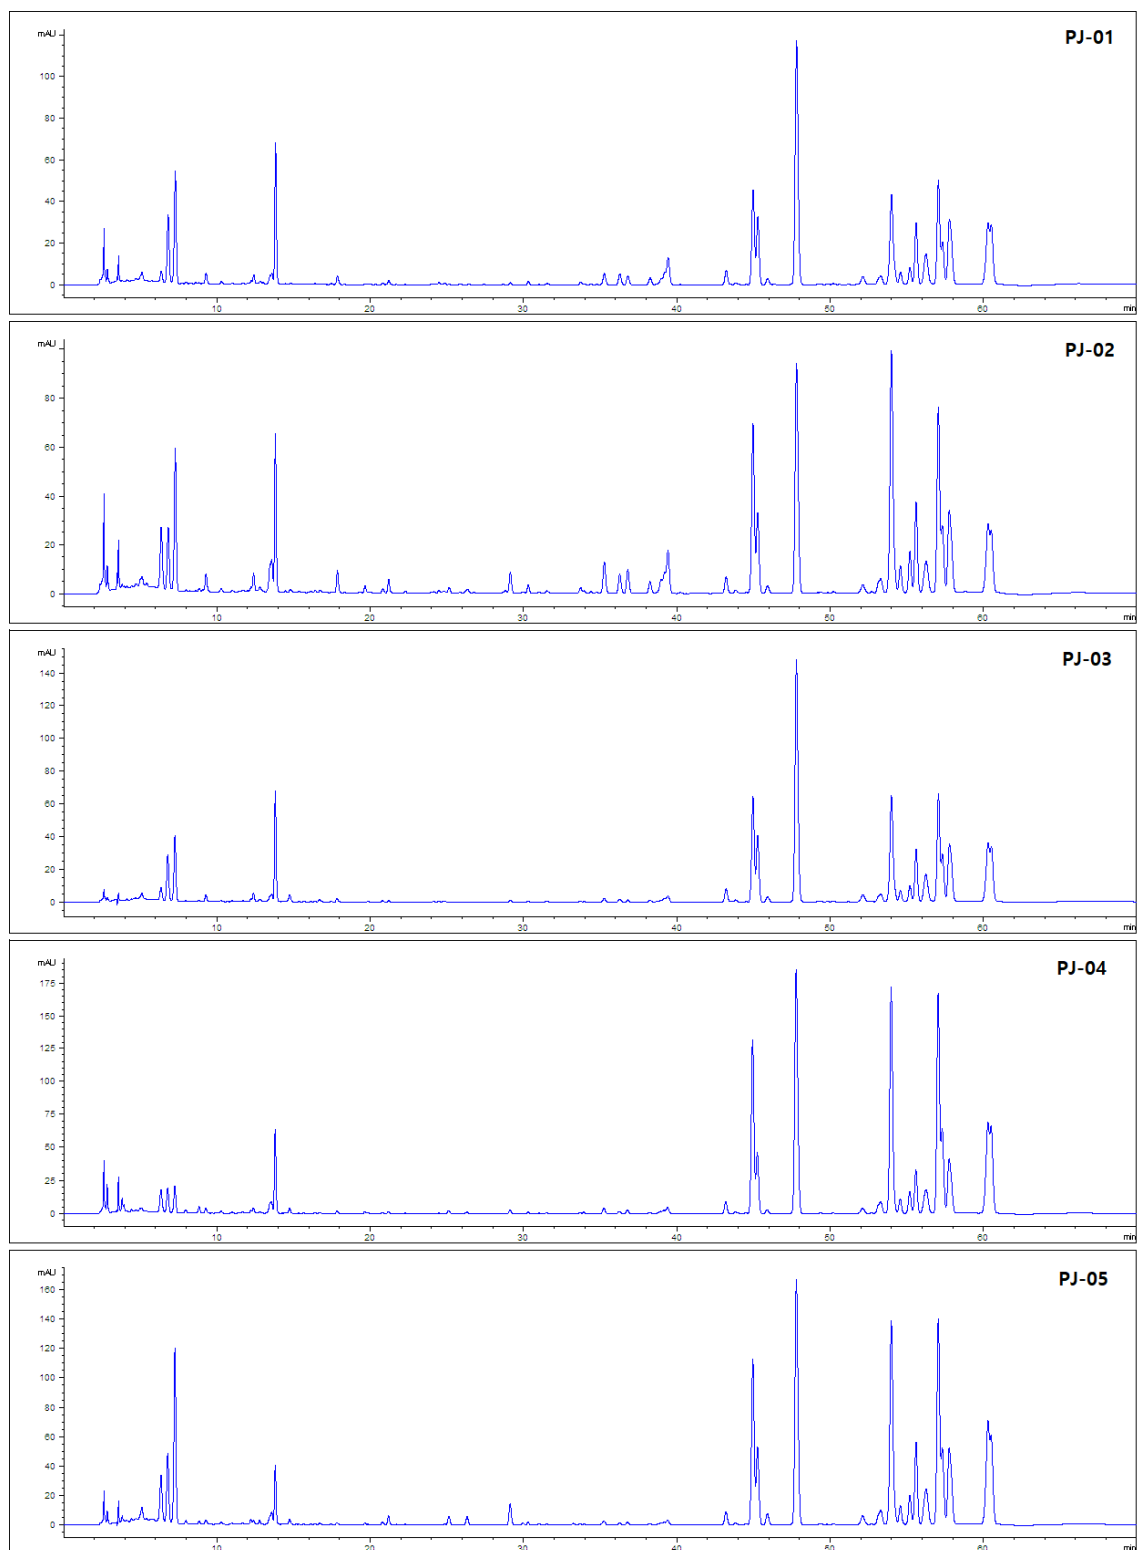

Figure S1. Chromatograms of the samples of *Peucedanum japonicum* (PJ01–16), *P. praeruptorum* (PP01–27), *Angelica decursiva* (AD01–07), and *Saposhnikovia divaricata* (SD01–10) at a detection wavelength of 325 nm.

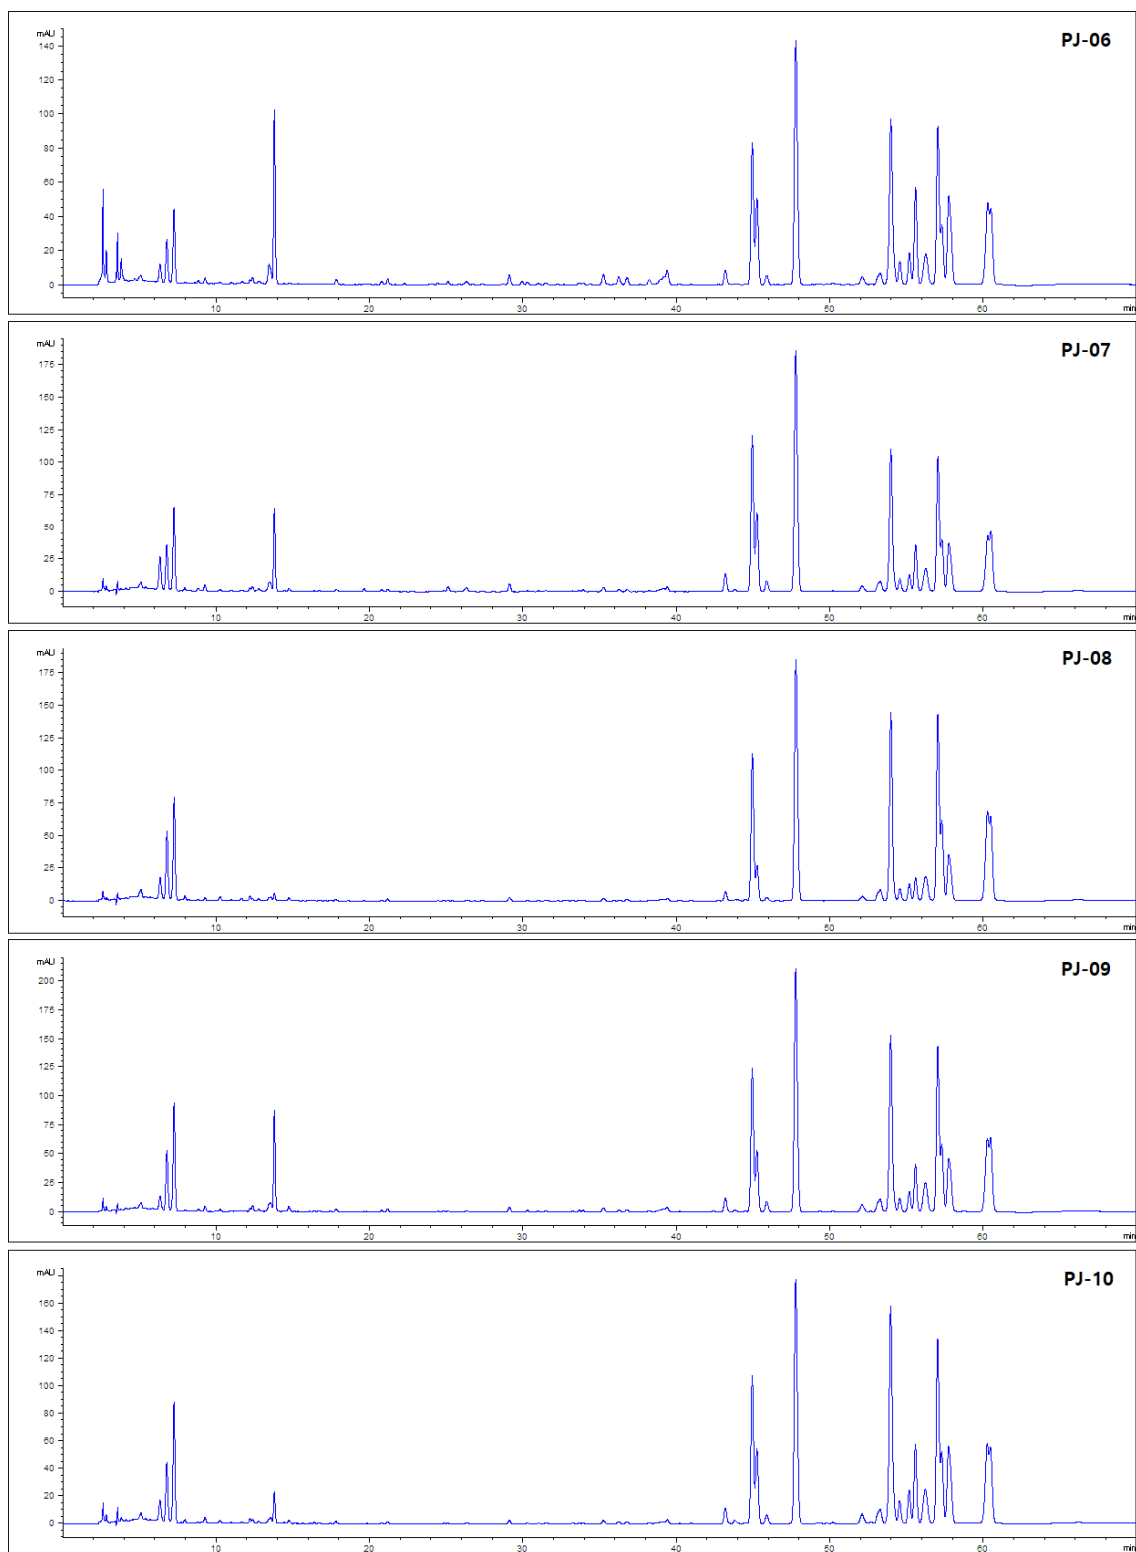

*Continued.*

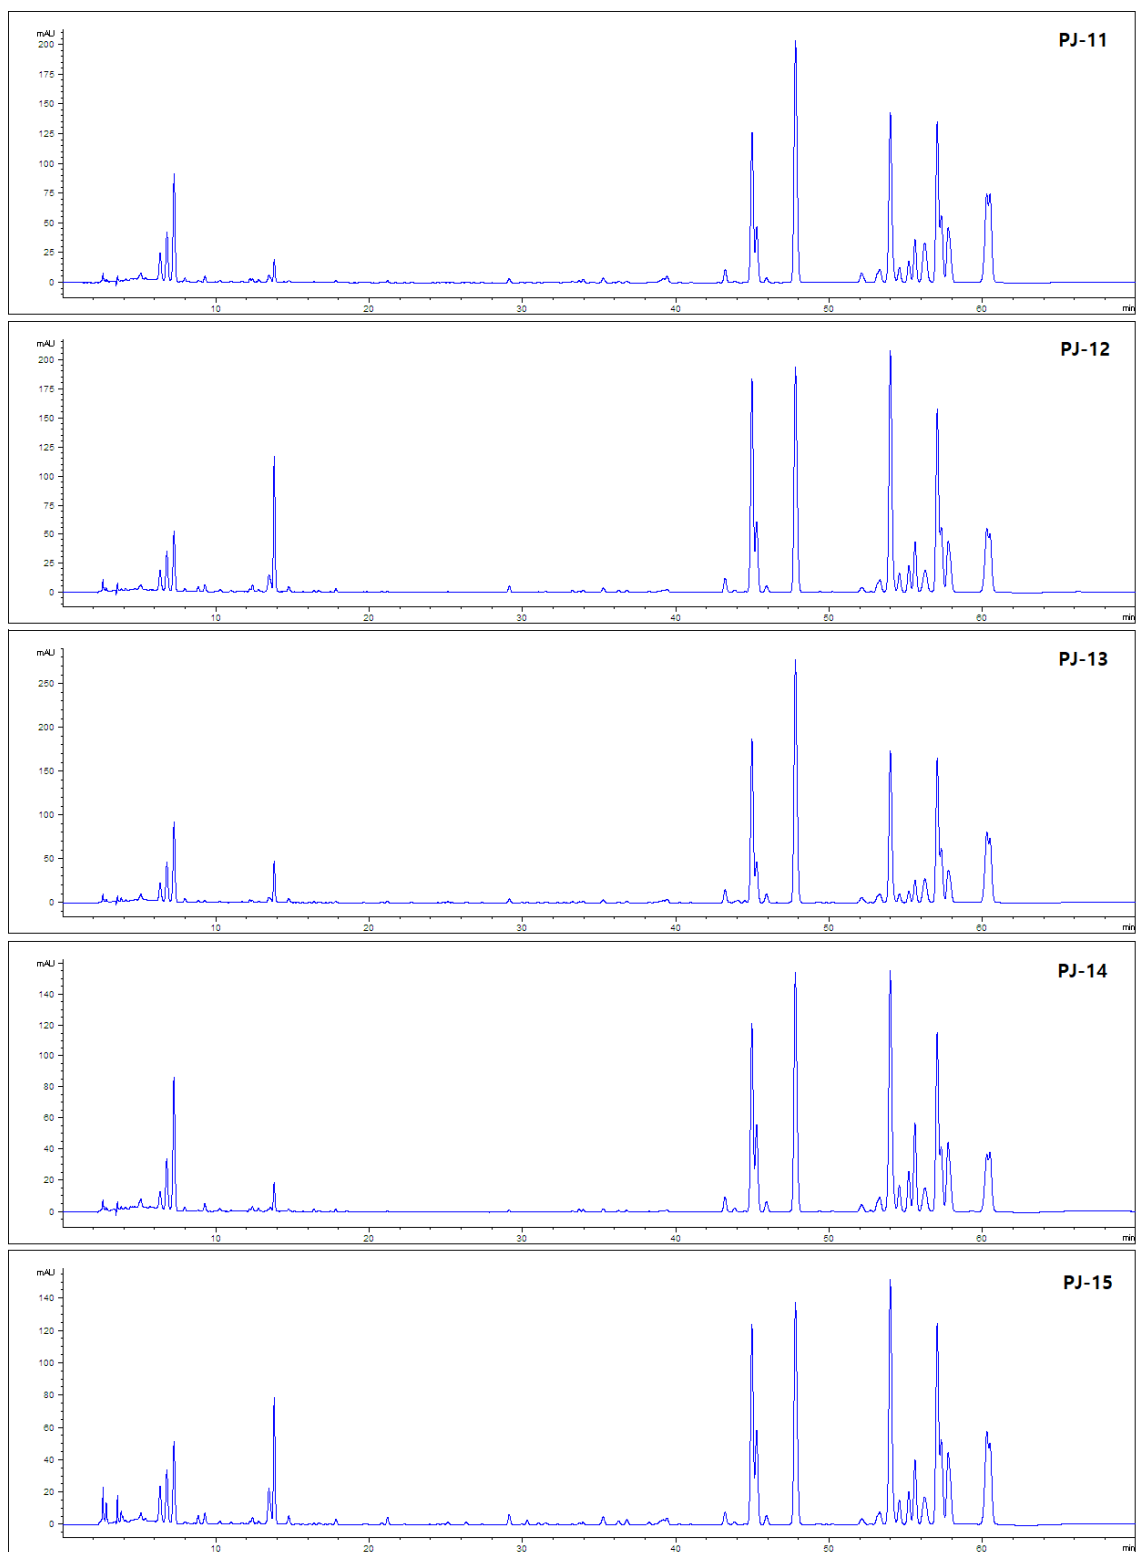

*Continued.*

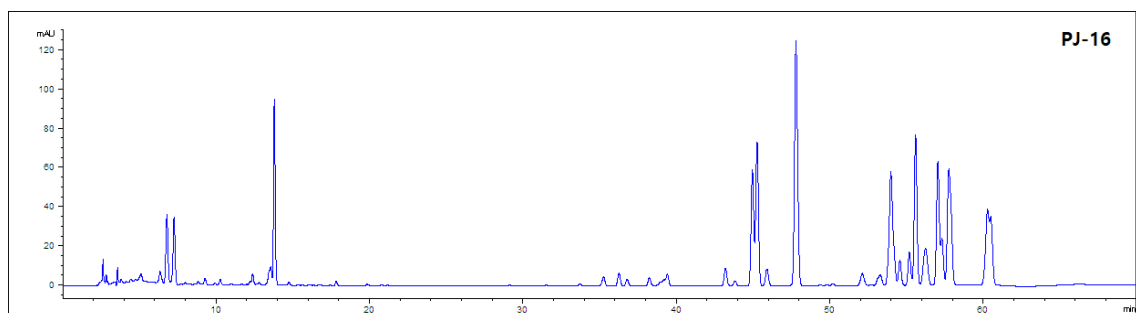

*Continued.*

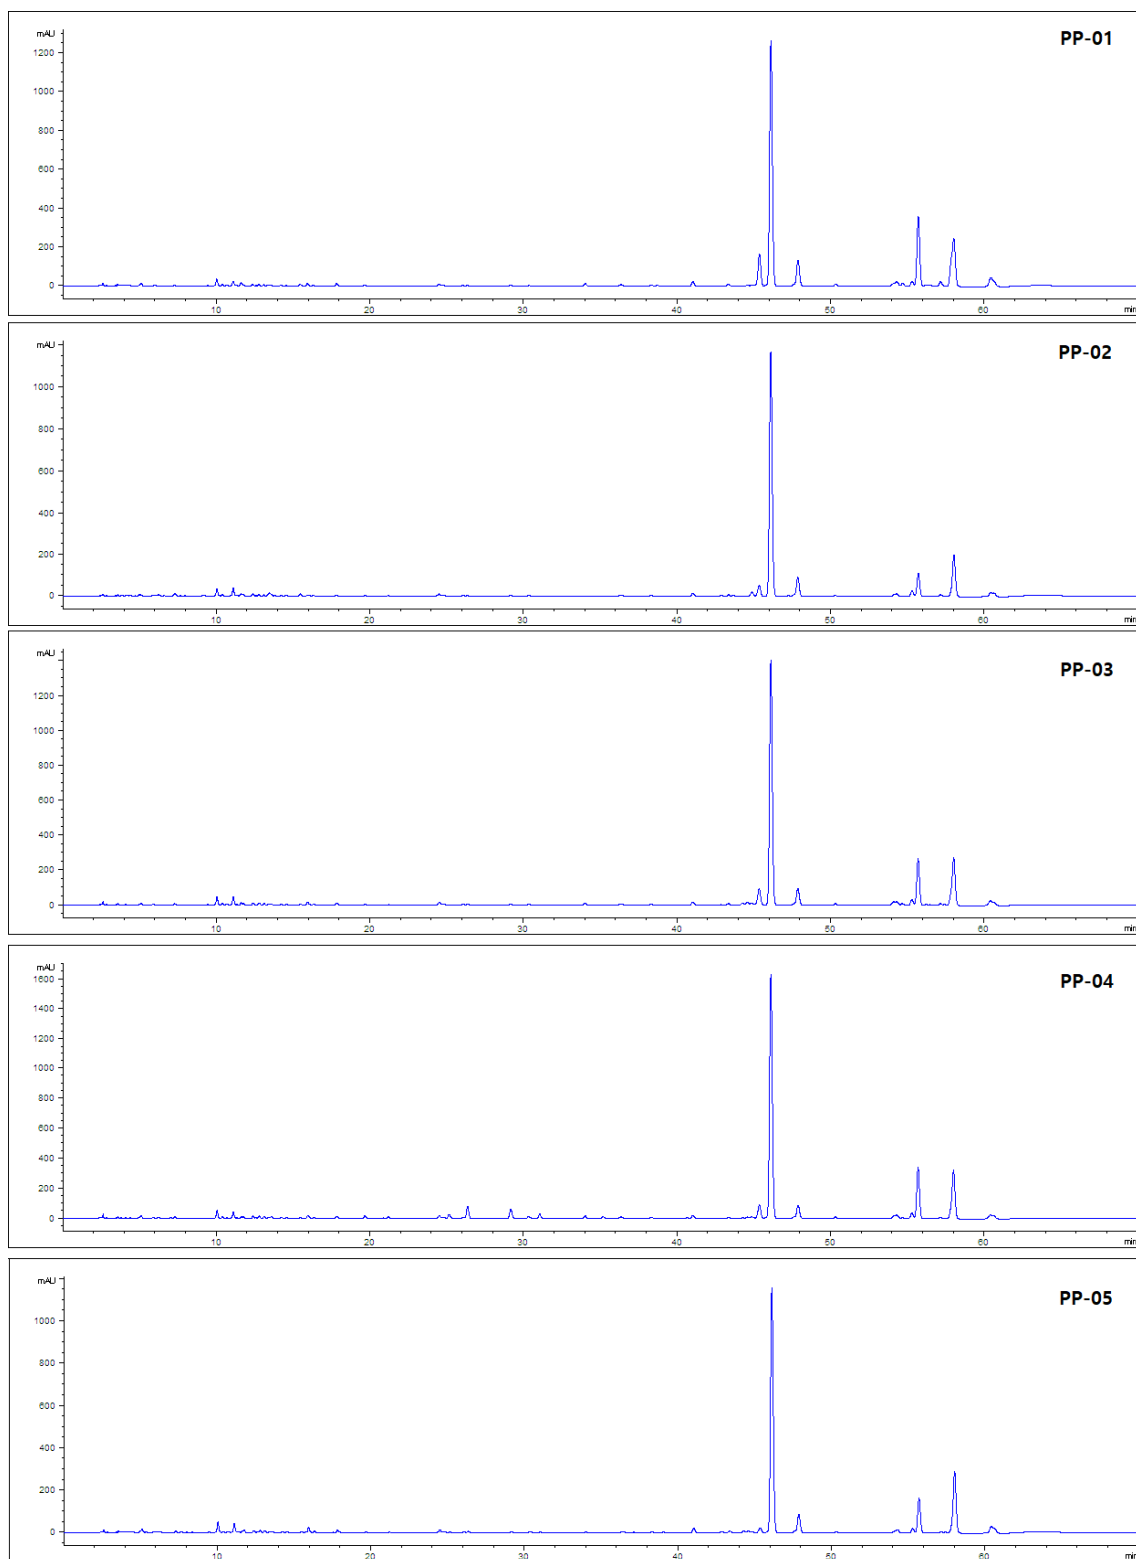

*Continued.*

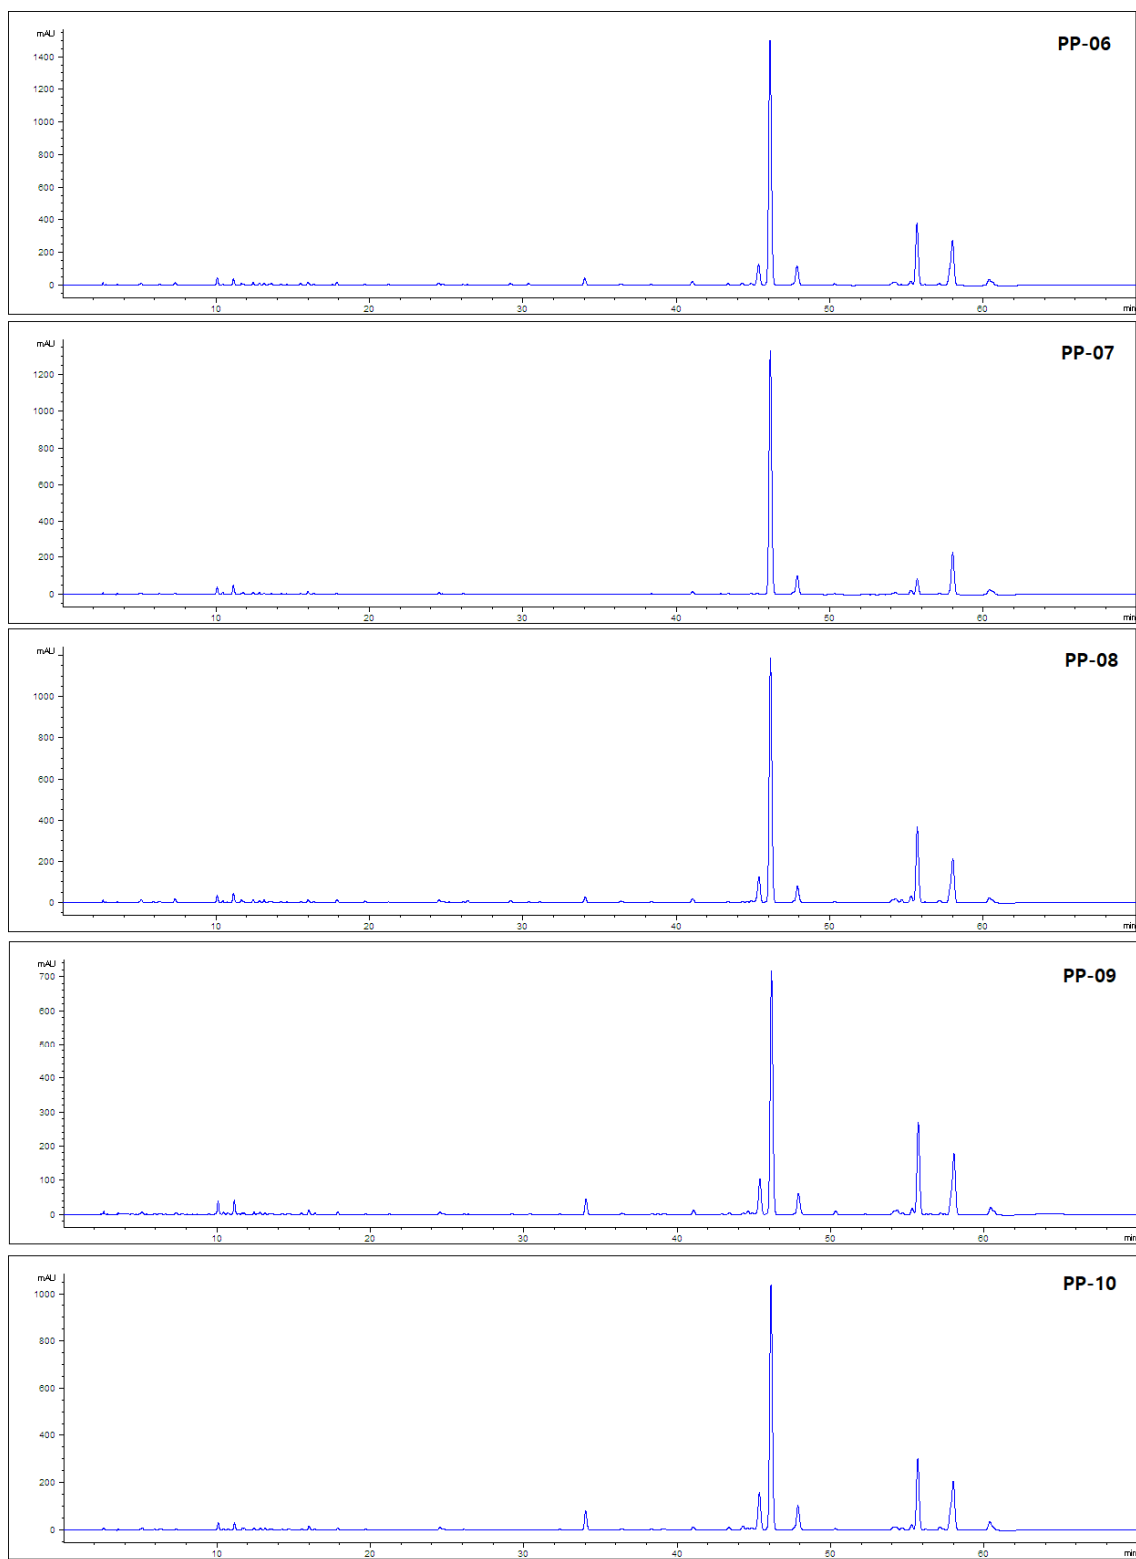

*Continued.*

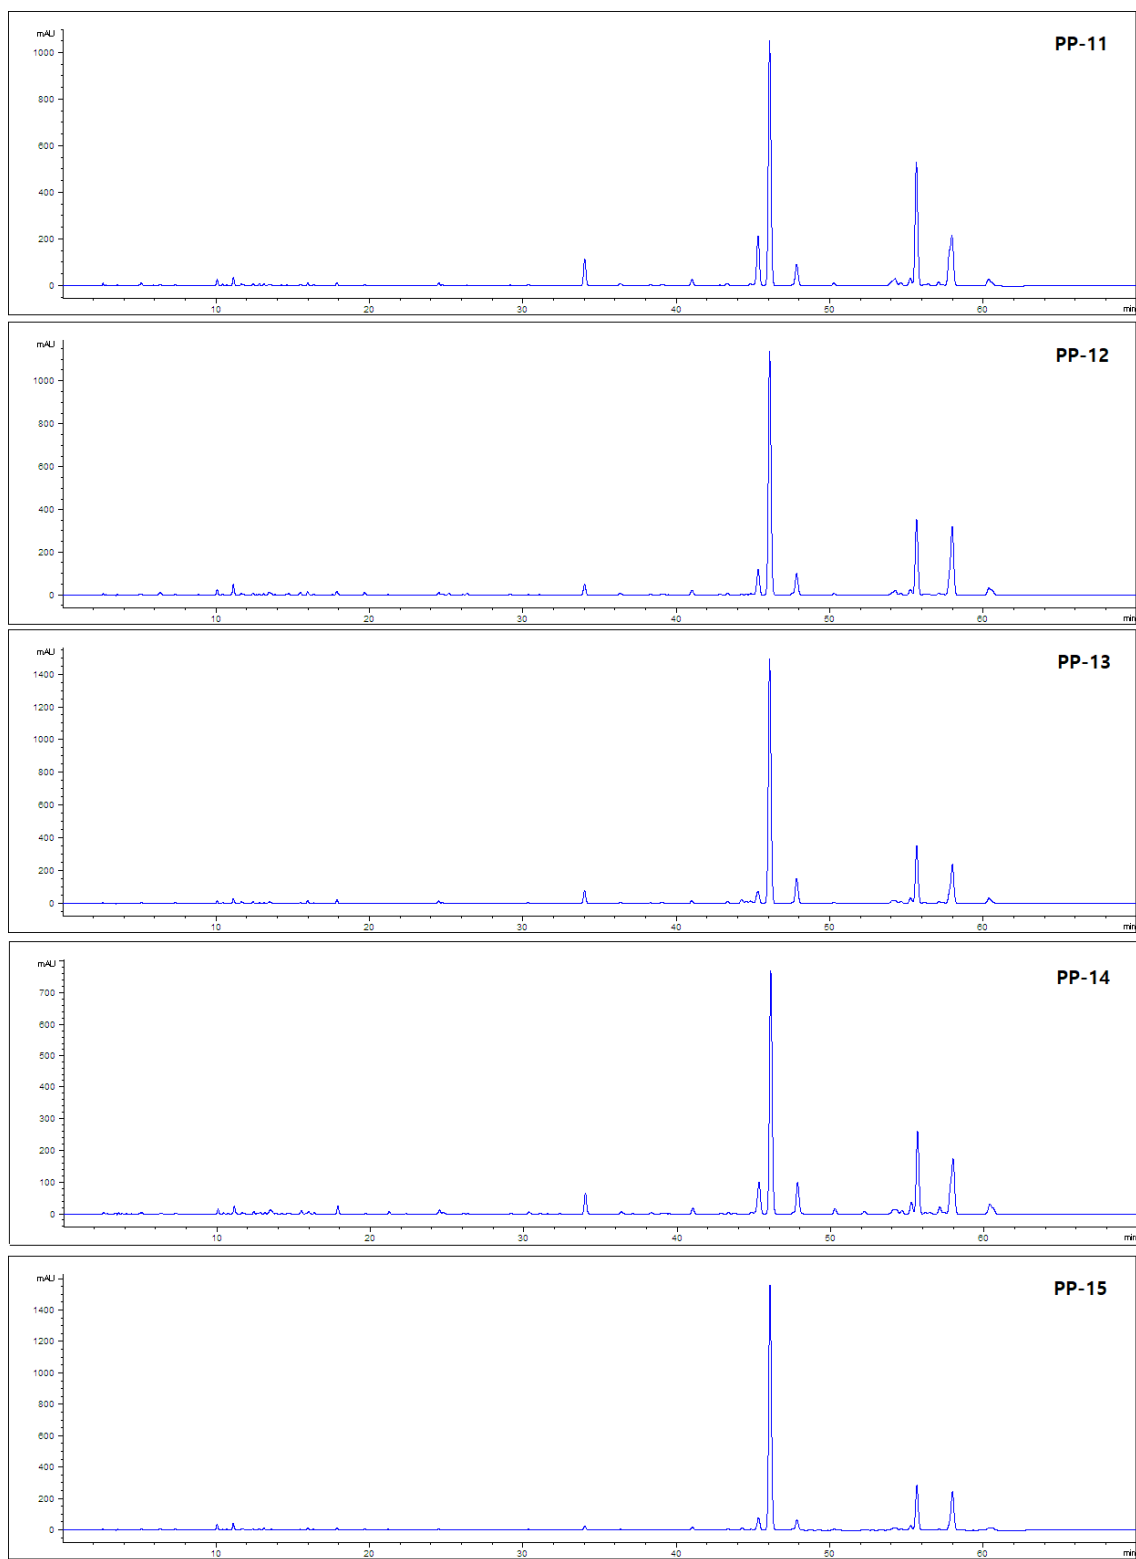

*Continued.*



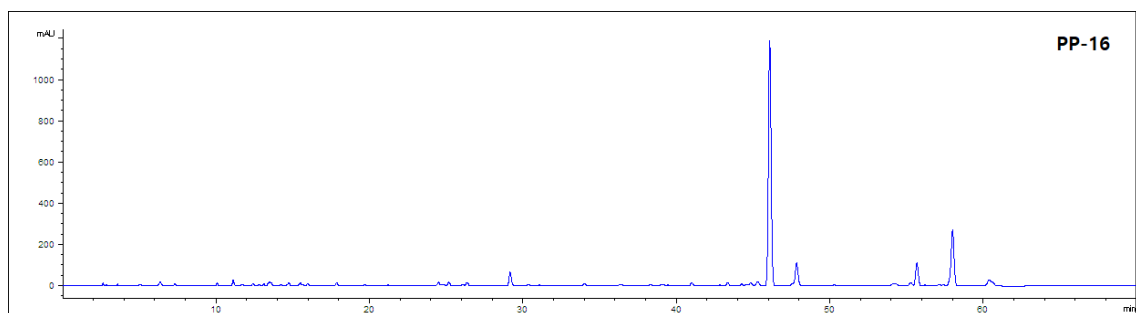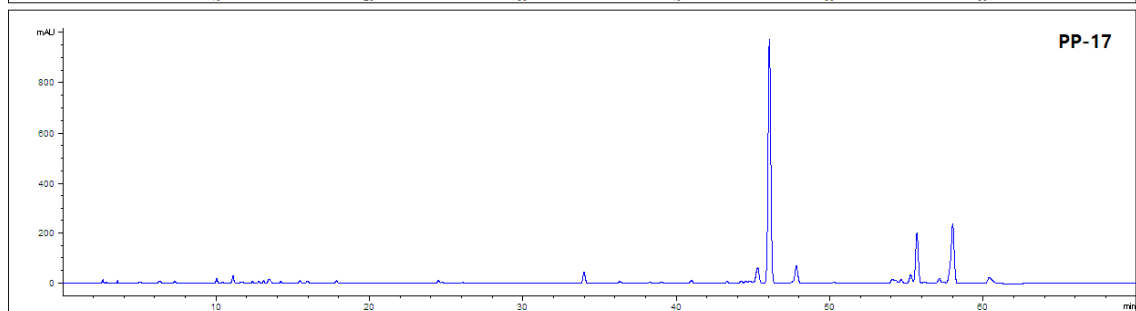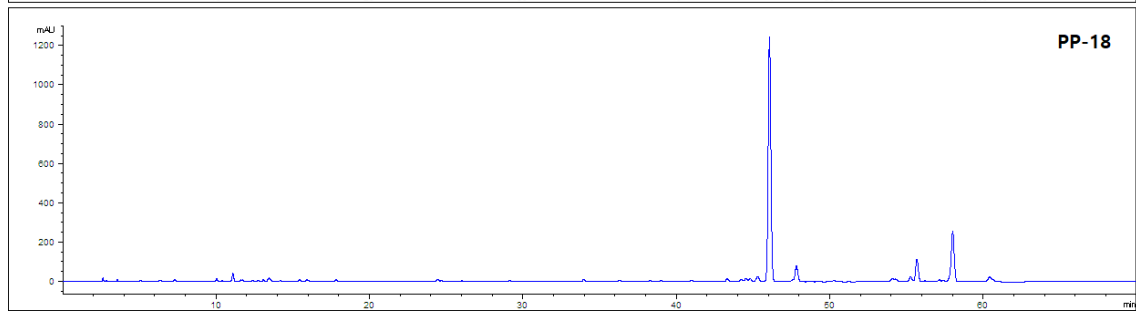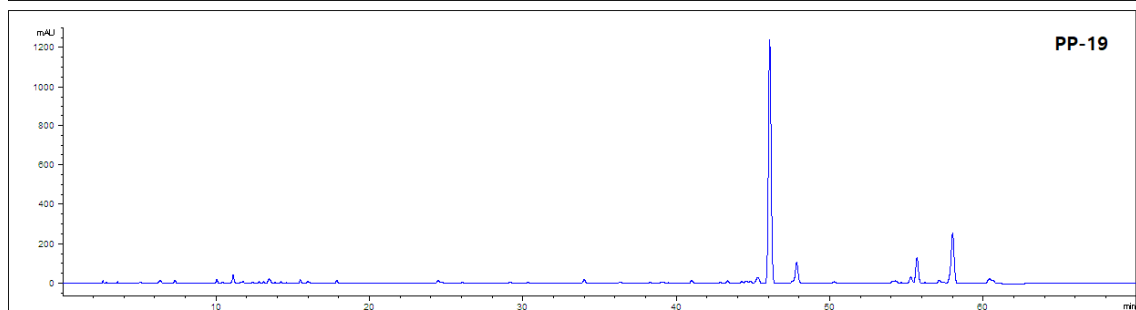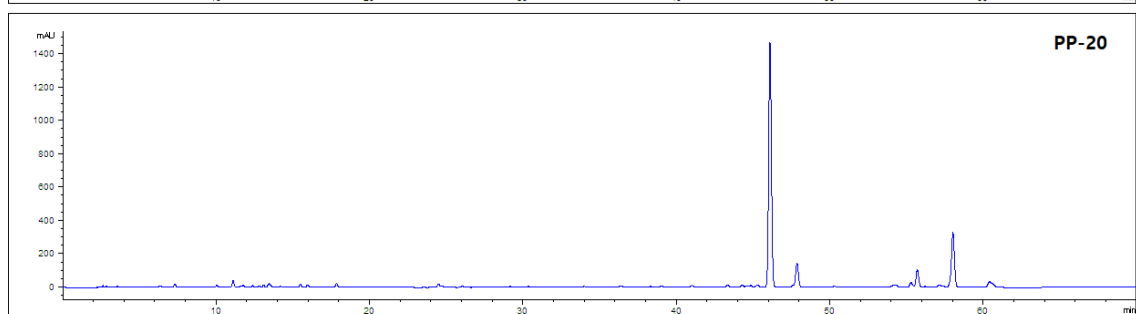

*Continued.*

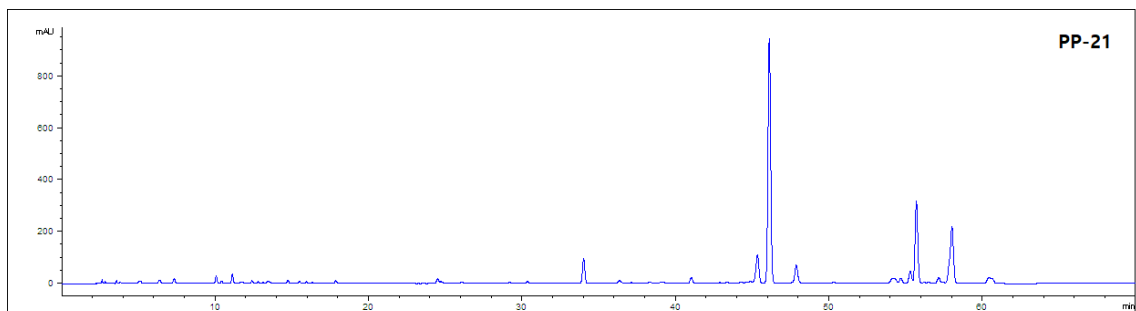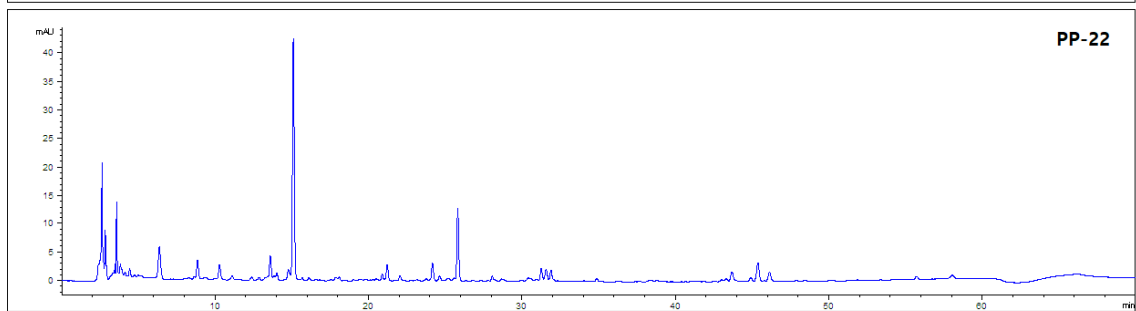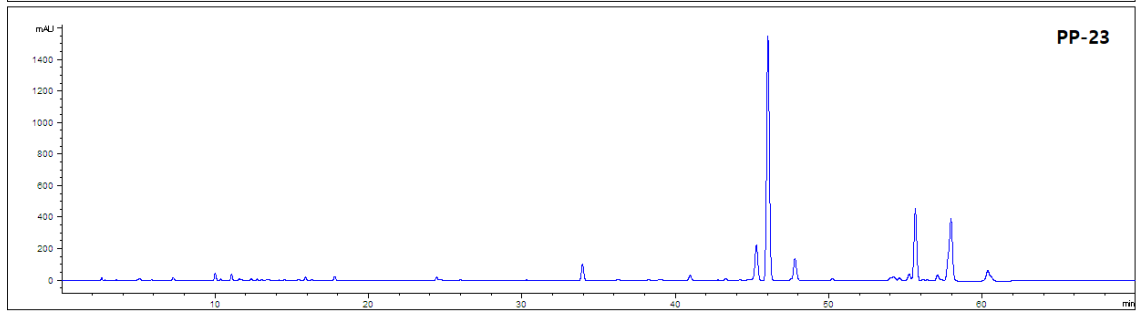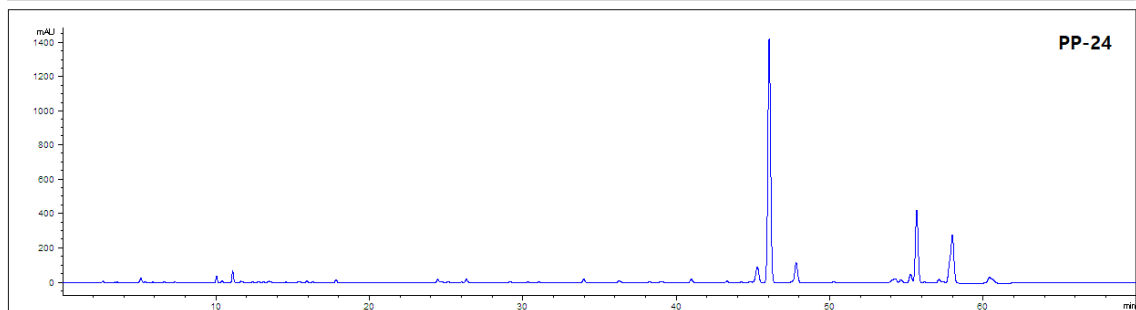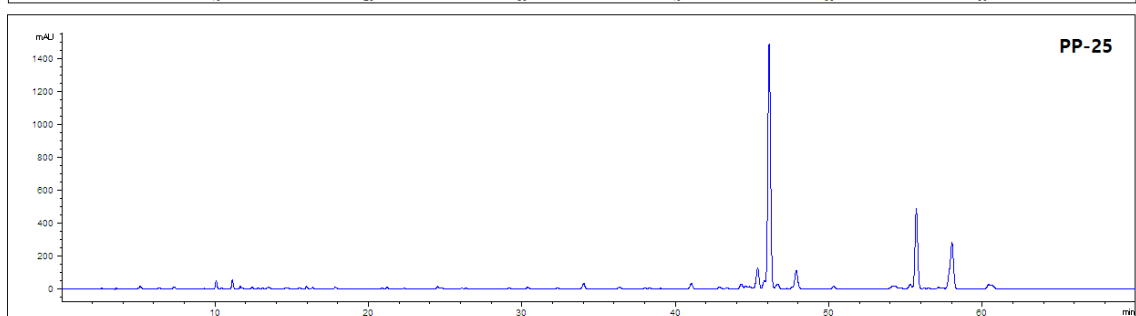

*Continued.*

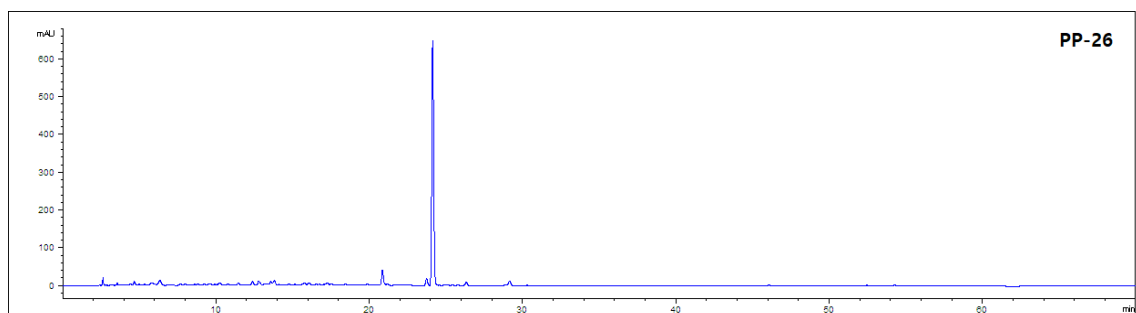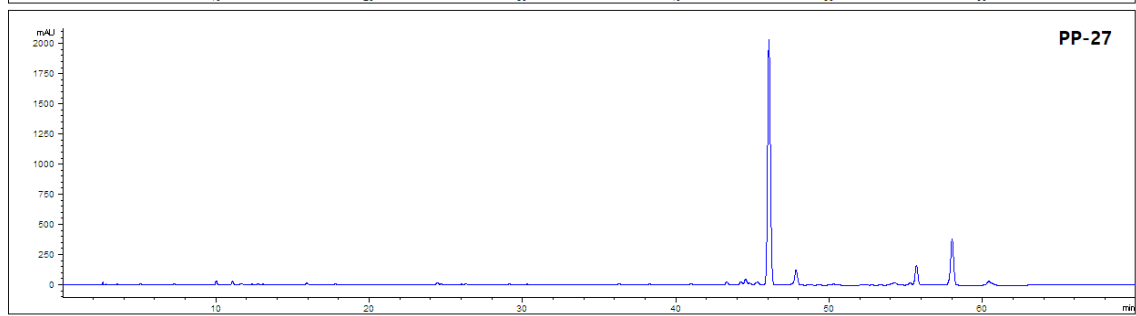

*Continued.*

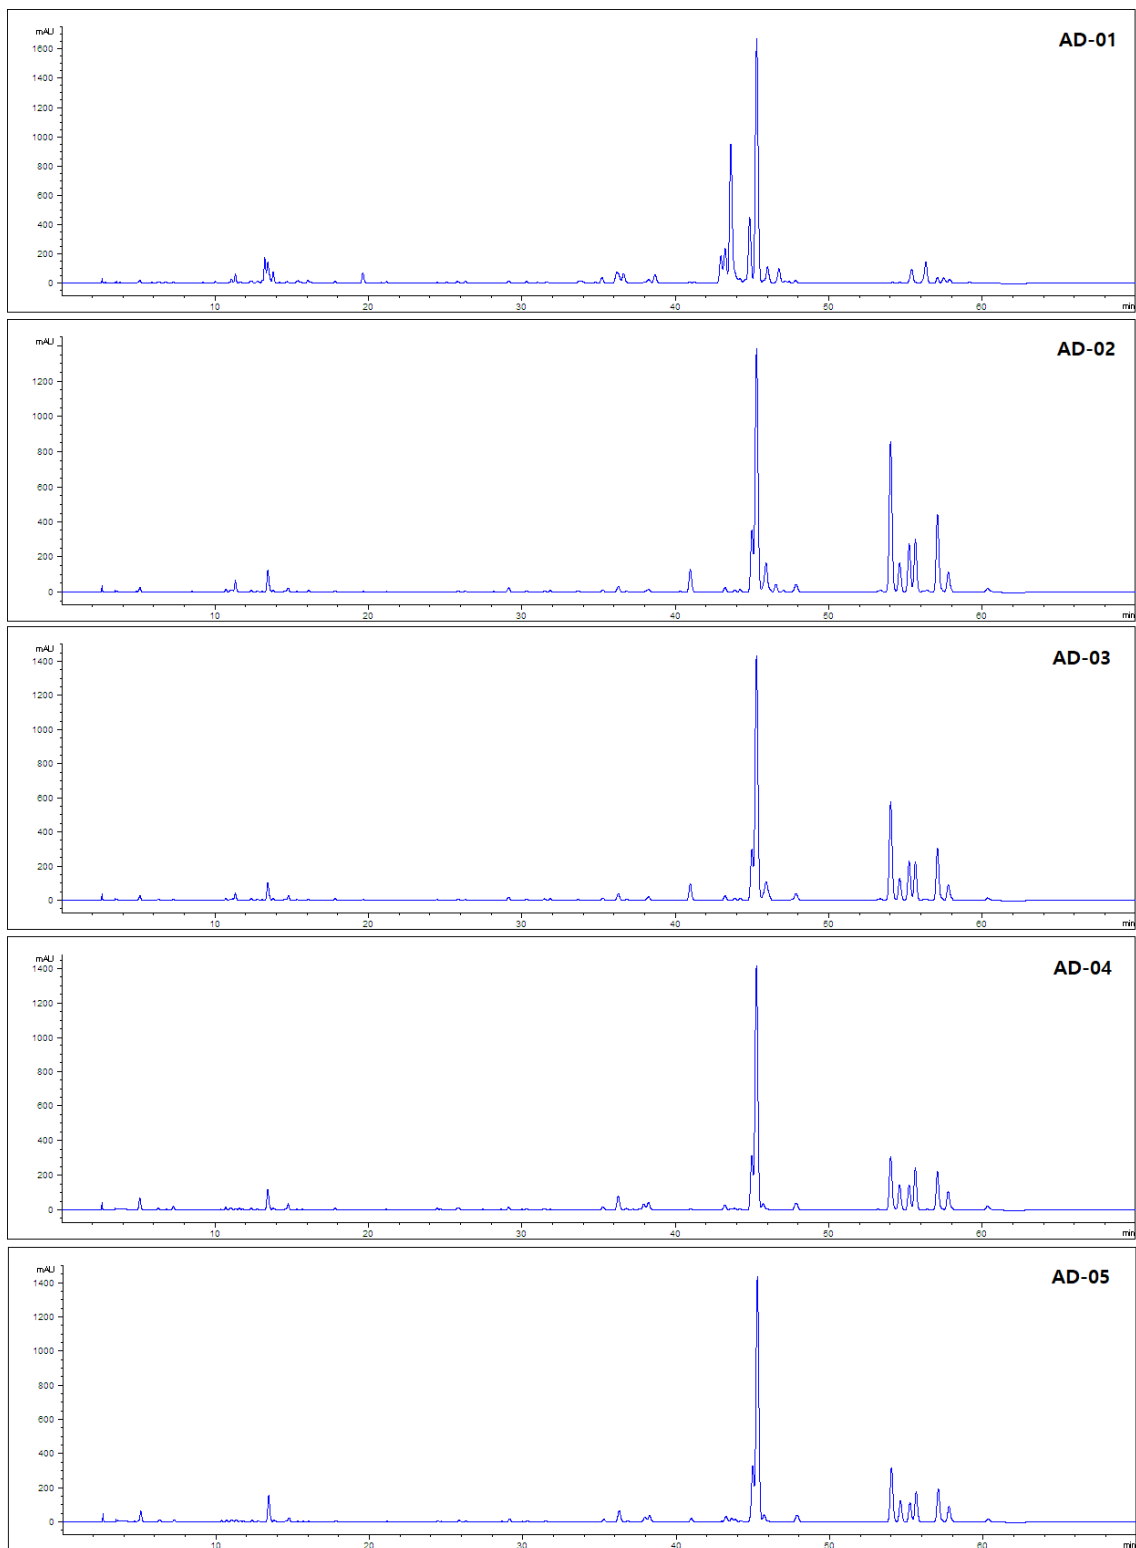

*Continued.*

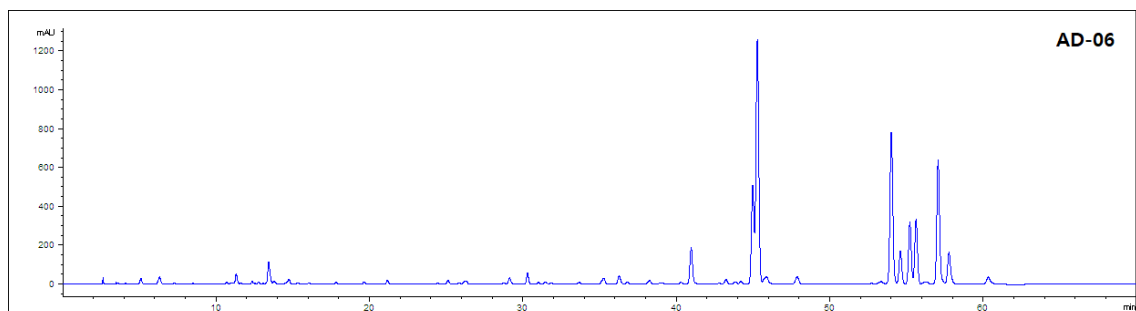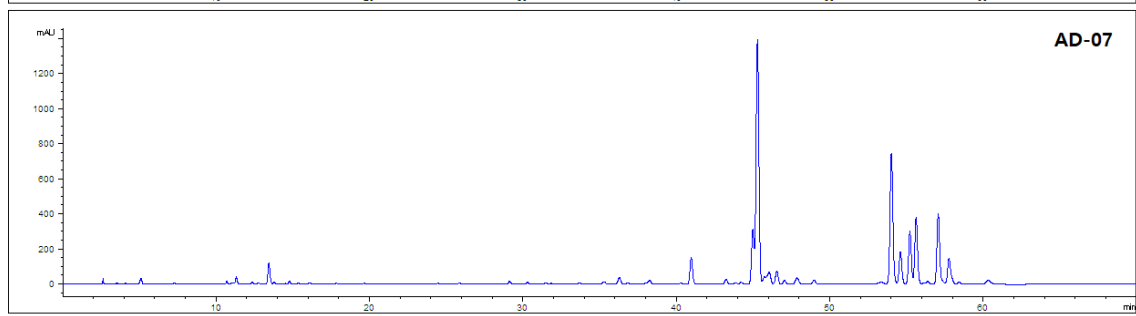

*Continued.*

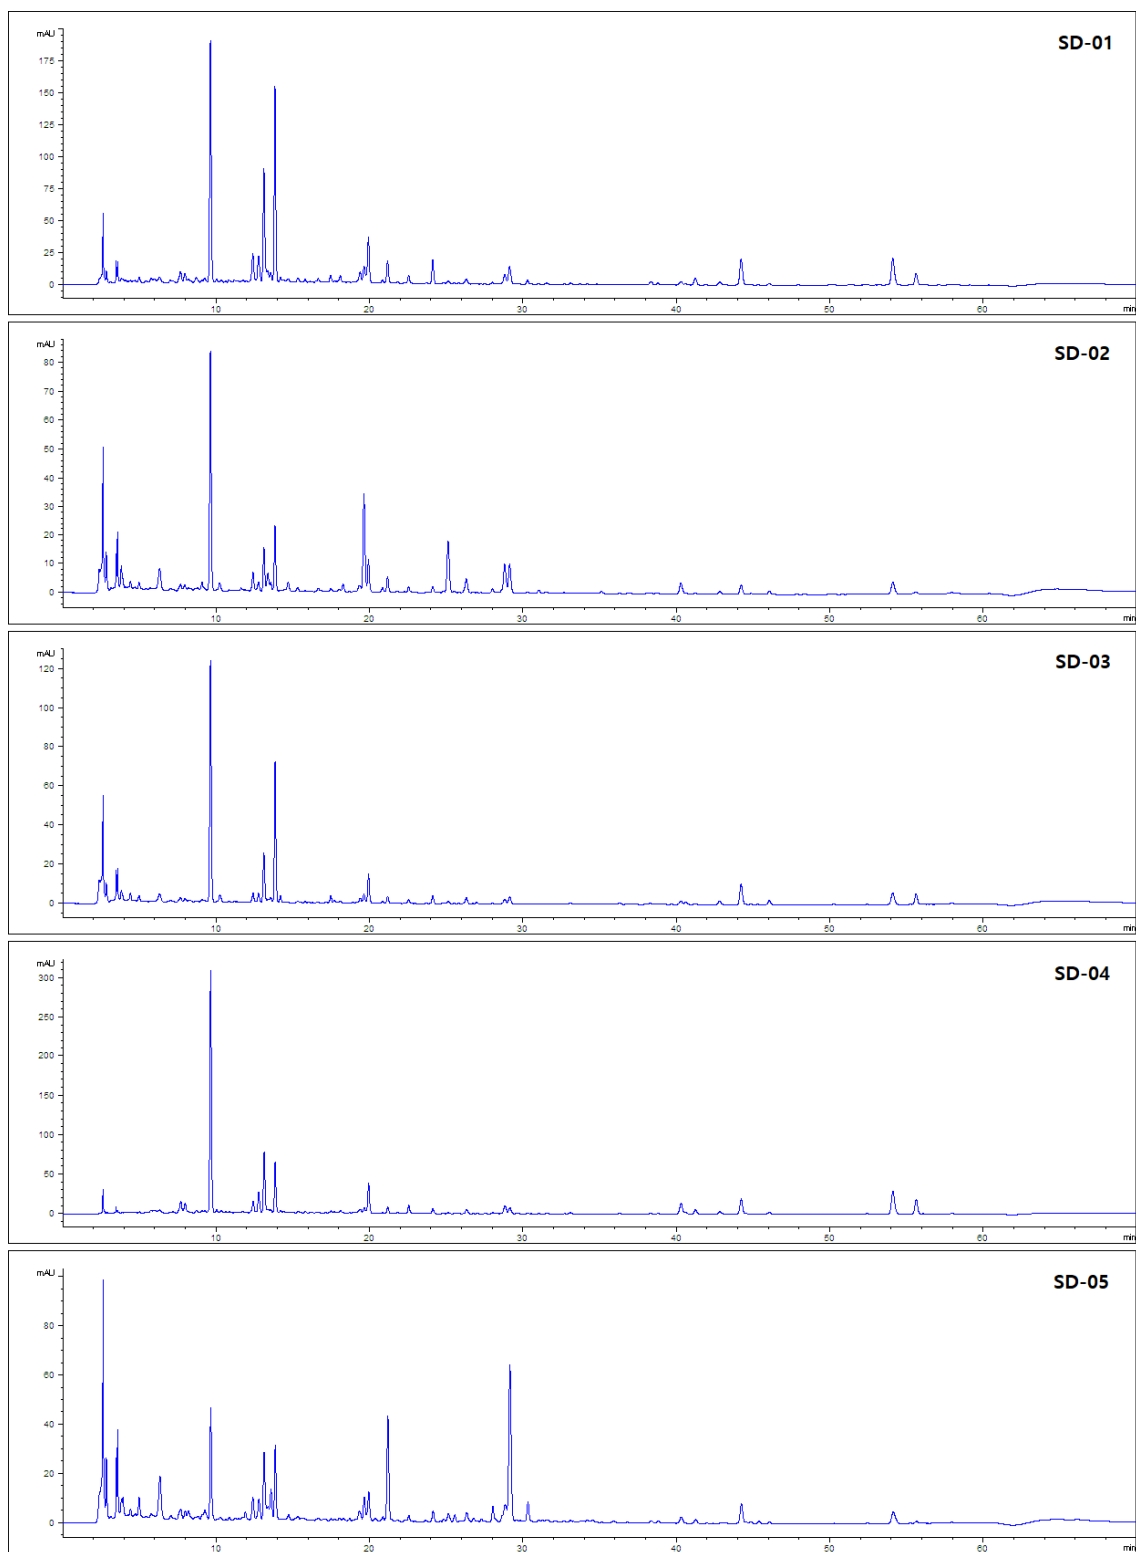

*Continued.*

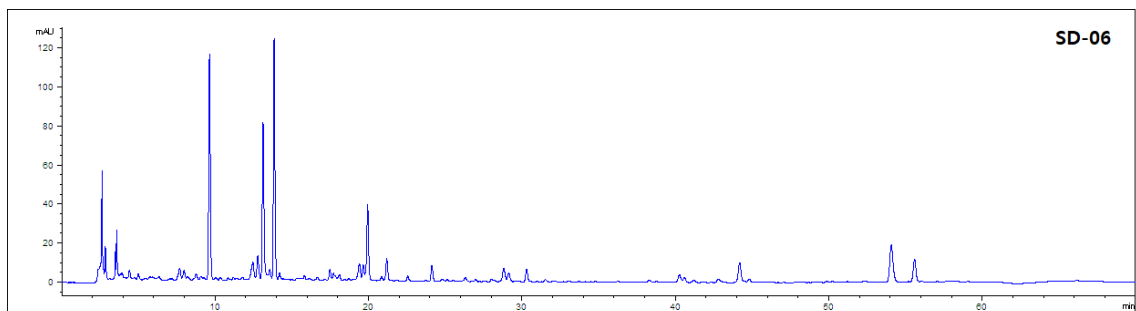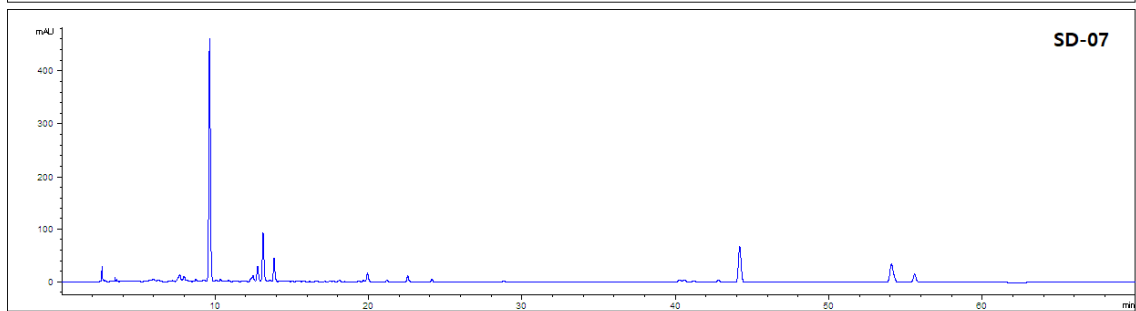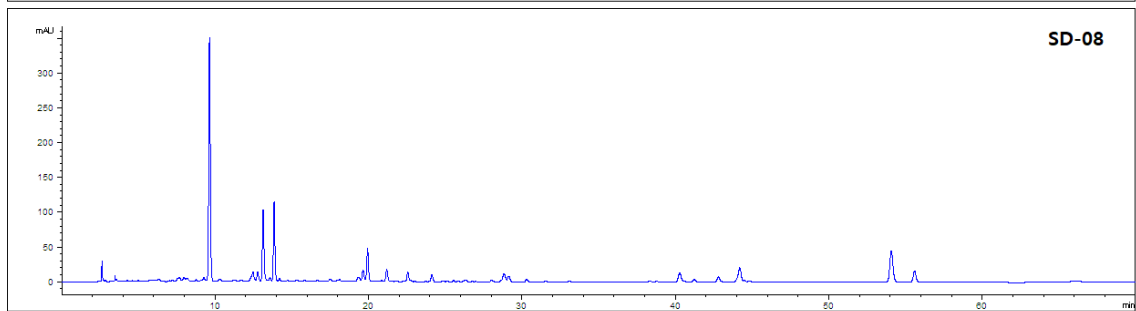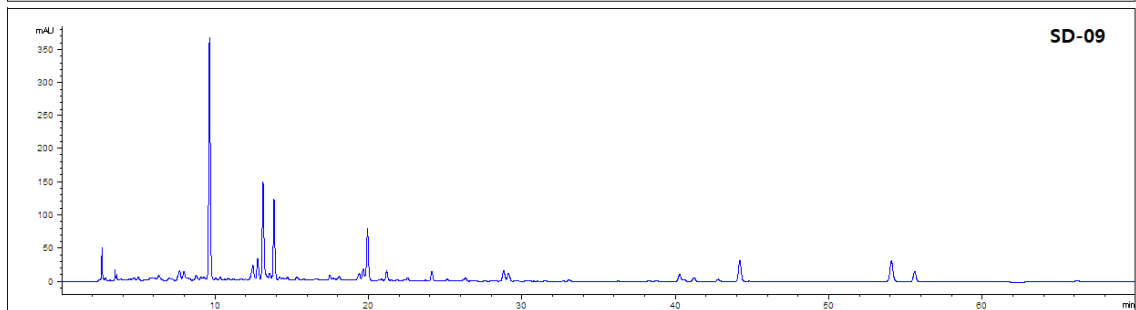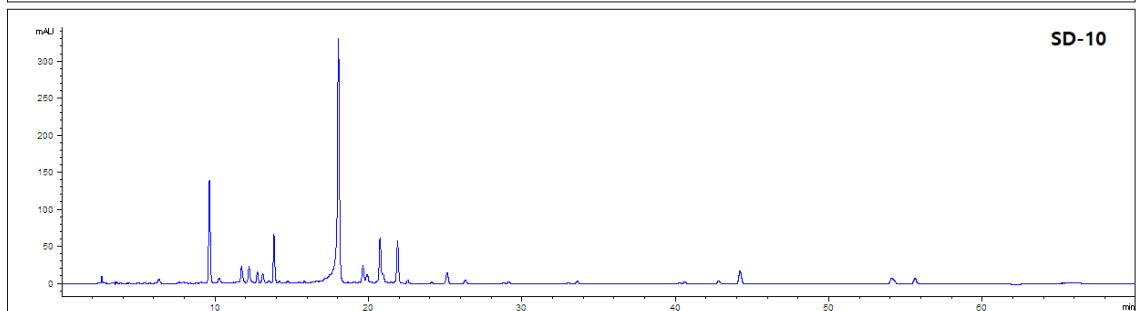

*Continued.*

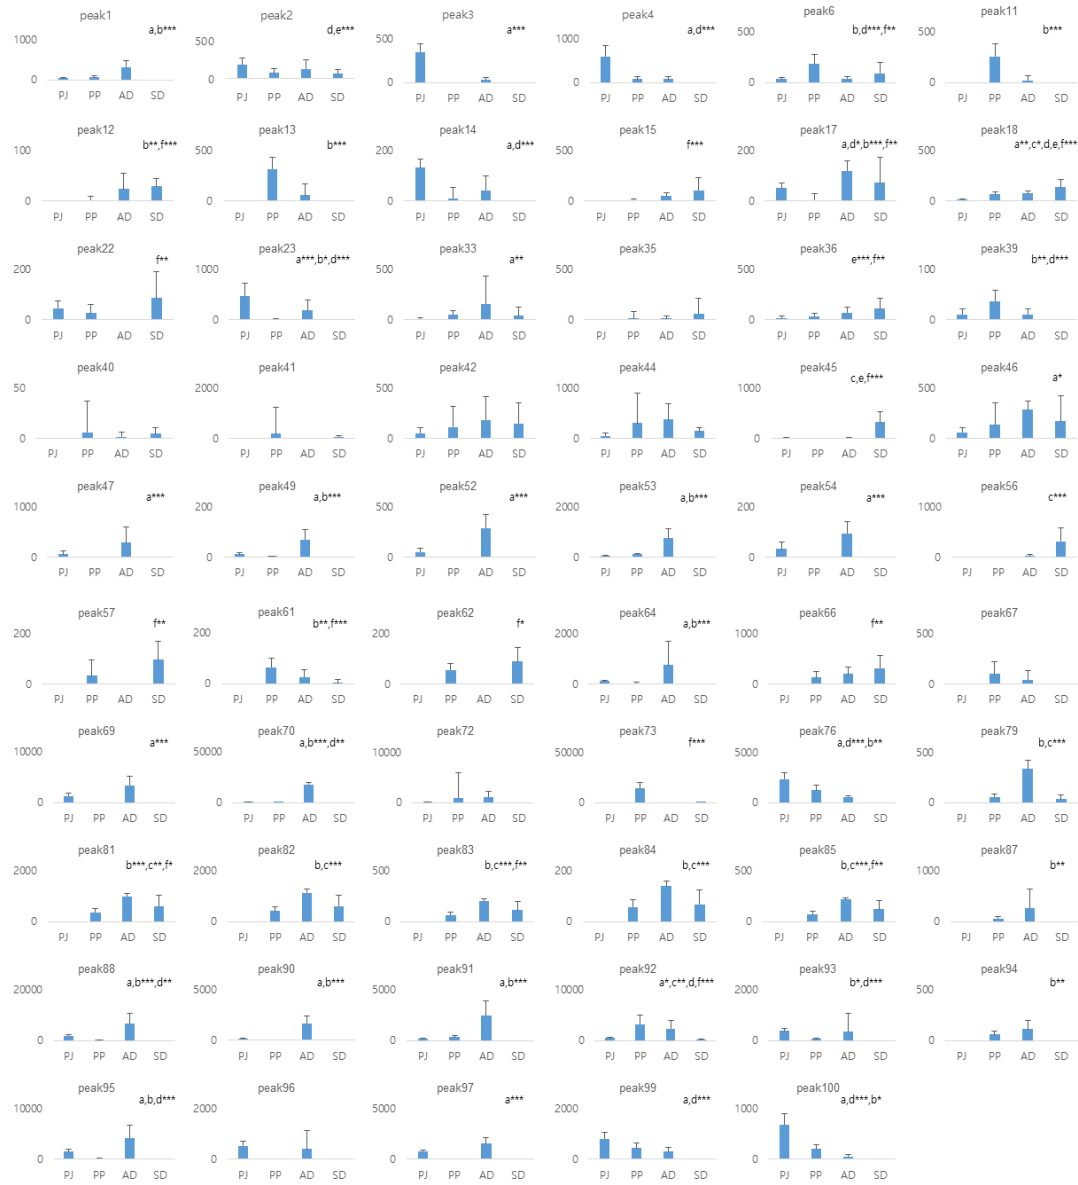

Figure S2. Multiple comparison of absolute areas of profiling peaks from *P. japonicum* (PJ), *P. praeruptorum* (PP), *A. decursiva* (AD), and *S. divaricata* (SD) samples. Difference in peaks areas among the samples was compared using the Tukey's test, with significance at  $^*p < 0.05$ ,  $^{**}p < 0.01$ , and  $^{***}p < 0.001$ . (a) PJ and AD, (b) PP and AD, (c) AD and SD, (d) PP and PJ, (e) PJ and SD, and (f) PP and SD.



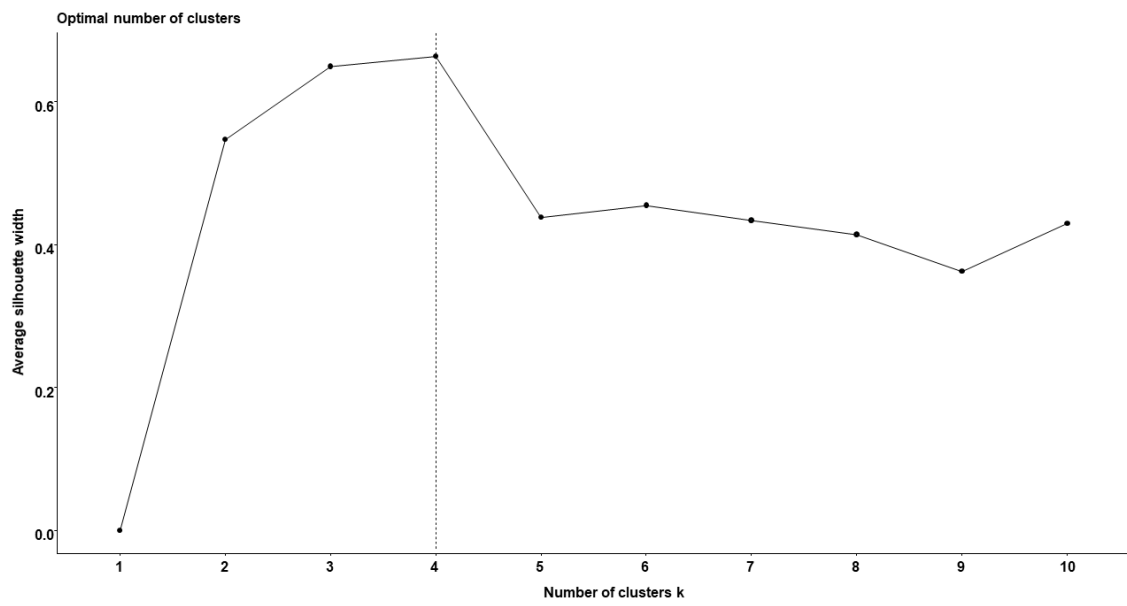

Figure S3. Silhouette plot for the selection of optimal number of clusters in  $k$ -means clustering.

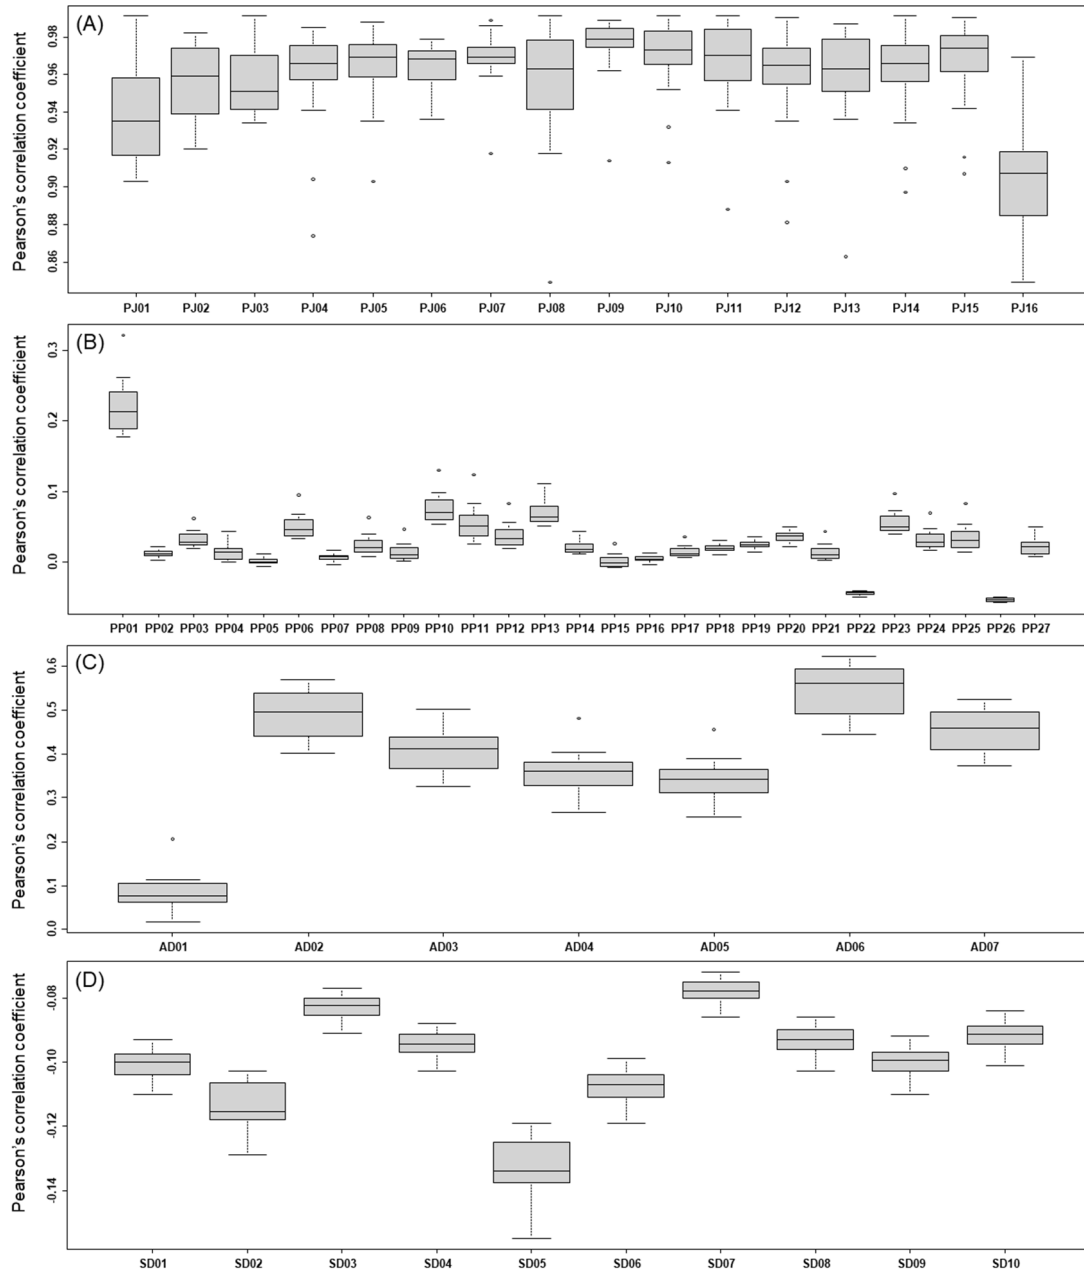

Figure S4. Average Pearson's correlation coefficients of *Peucedanum japonicum* samples (PJ) to other species samples with PJ (A), PP (B), AD (C), and SD (D).

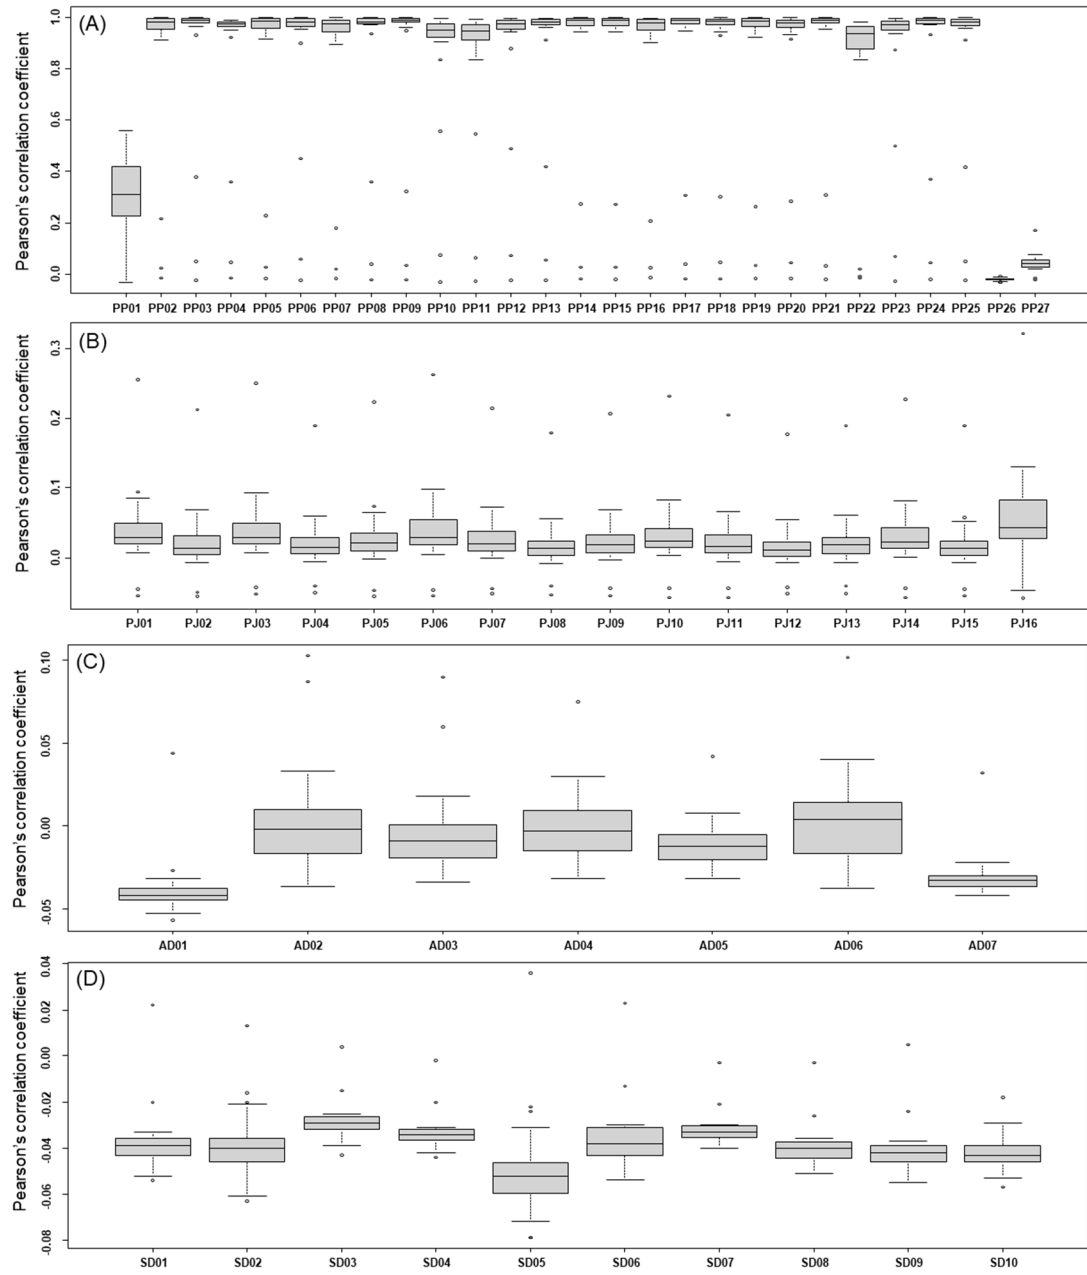

Figure S5. Average Pearson's correlation coefficients of *P. praeruptorum* samples (PP) to other species samples with PP (A), PJ (B), AD (C), and SD (D).

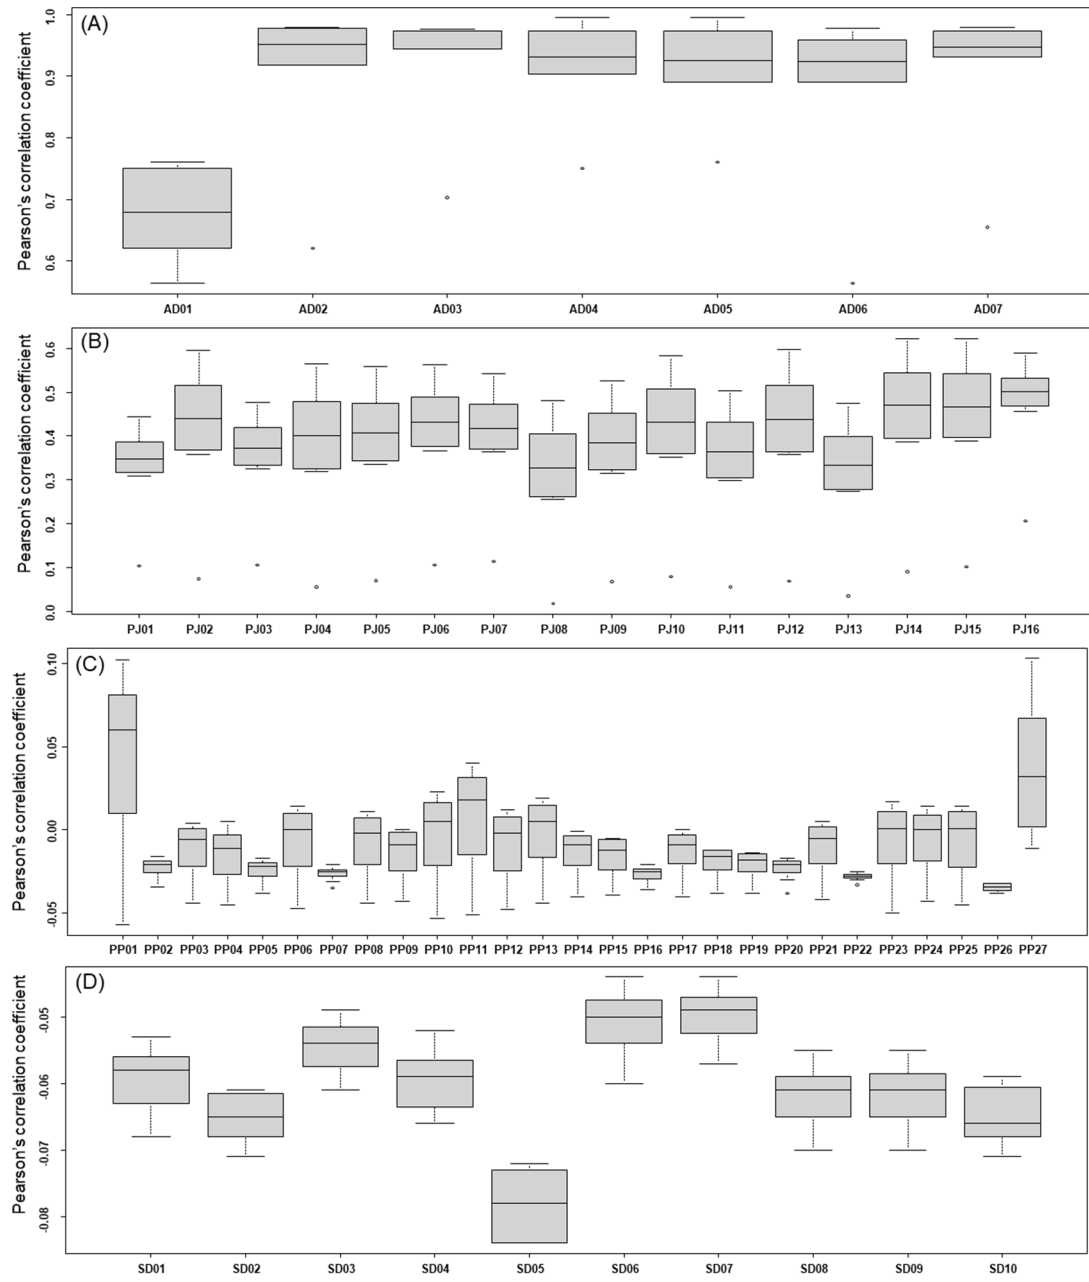

Figure S6. Average Pearson's correlation coefficients of *A. decursiva* samples (AD) to other species samples with AD (A), PJ (B), PP (C), and SD (D).

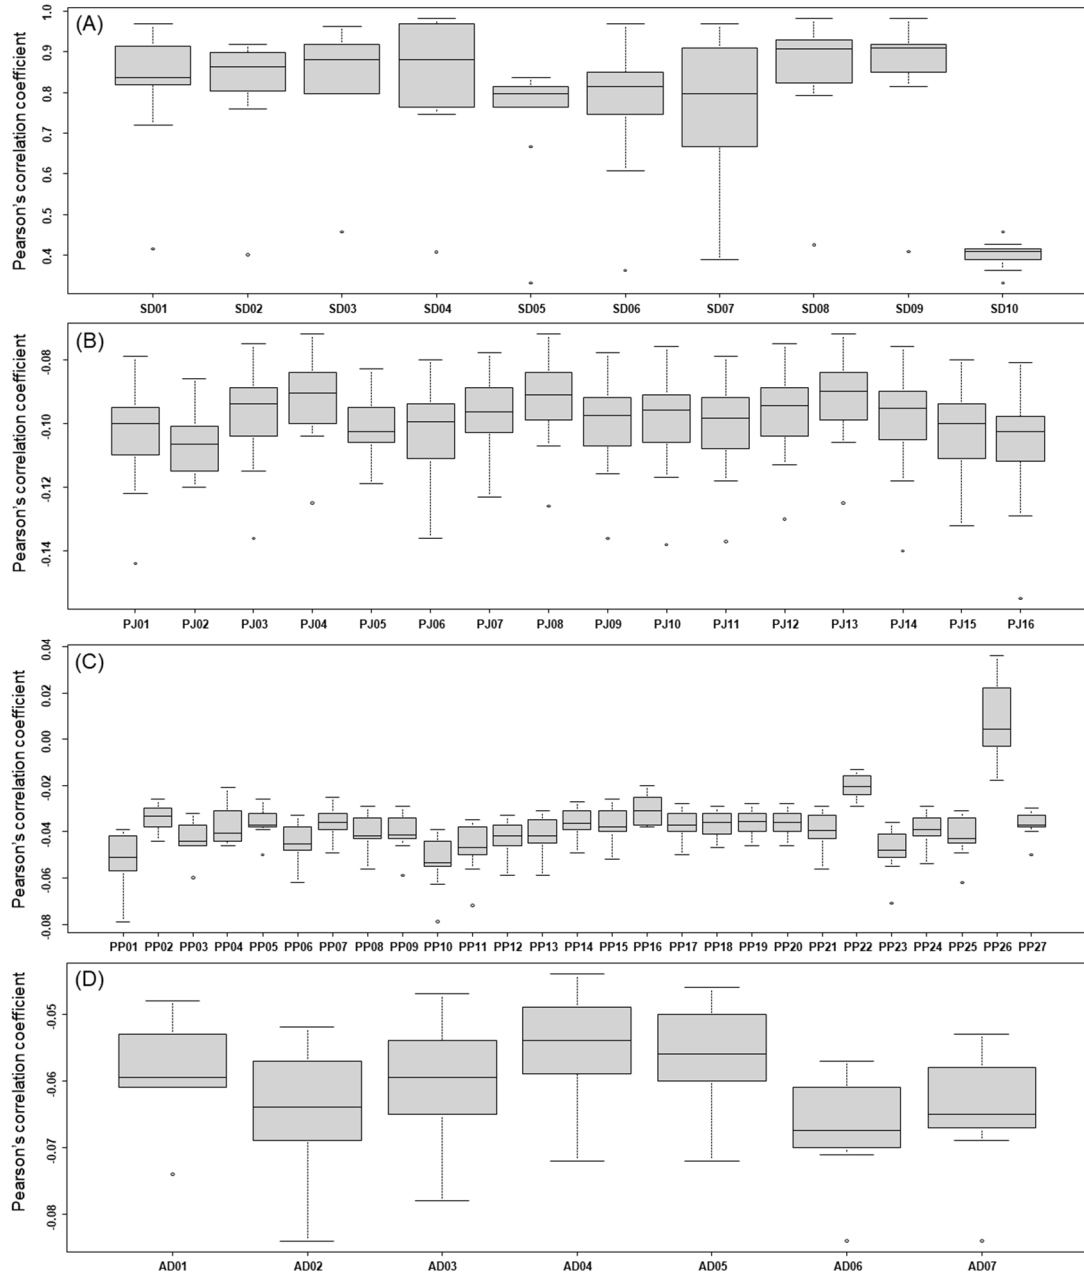

Figure S7. Average Pearson's correlation coefficients of *S. divaricata* samples (SD) to other species samples with SD (A), PJ (B), PP (C), and AD (D).

Table S1. The sequence identity matrix (excel file attached)

Table S2. Retention times and detection wavelengths of profiling peaks in the samples

| Peak No. | Retention time (min) | Detection wavelength (nm) | Peak No. | Retention time (min) | Detection wavelength (nm) |
|----------|----------------------|---------------------------|----------|----------------------|---------------------------|
| peak1    | 5.07                 | 310                       | peak51   | 34.59                | 250                       |
| peak2    | 6.34                 | 325                       | peak52   | 35.25                | 325                       |
| peak3    | 6.79                 | 325                       | peak53   | 36.28                | 325                       |
| peak4    | 7.25                 | 325                       | peak54   | 36.78                | 325                       |
| peak5    | 7.95                 | 275                       | peak55   | 37.92                | 310                       |
| peak6    | 8.58                 | 275                       | peak56   | 40.28                | 250                       |
| peak7    | 8.80                 | 325                       | peak57   | 40.58                | 250                       |
| peak8    | 9.21                 | 325                       | peak58   | 40.97                | 350                       |
| peak9    | 9.23                 | 310                       | peak59   | 41.02                | 310                       |
| peak10   | 9.60                 | 300                       | peak60   | 41.21                | 250                       |
| peak11   | 10.01                | 335                       | peak61   | 42.81                | 310                       |
| peak12   | 10.31                | 325                       | peak62   | 42.83                | 275                       |
| peak13   | 11.07                | 335                       | peak63   | 42.94                | 325                       |
| peak14   | 11.35                | 275                       | peak64   | 43.20                | 325                       |
| peak15   | 11.78                | 275                       | peak65   | 43.59                | 325                       |
| peak16   | 11.81                | 235                       | peak66   | 44.20                | 335                       |
| peak17   | 12.37                | 310                       | peak67   | 44.53                | 325                       |
| peak18   | 12.74                | 325                       | peak68   | 44.82                | 325                       |
| peak19   | 13.10                | 300                       | peak69   | 44.95                | 325                       |
| peak20   | 13.22                | 335                       | peak70   | 45.26                | 325                       |
| peak21   | 13.37                | 325                       | peak71   | 45.35                | 325                       |
| peak22   | 13.58                | 325                       | peak72   | 45.86                | 325                       |
| peak23   | 13.80                | 335                       | peak73   | 46.05                | 325                       |
| peak24   | 13.81                | 300                       | peak74   | 46.52                | 325                       |
| peak25   | 14.67                | 325                       | peak75   | 47.02                | 325                       |
| peak26   | 14.76                | 350                       | peak76   | 47.86                | 325                       |
| peak27   | 15.08                | 325                       | peak77   | 48.37                | 275                       |
| peak28   | 15.65                | 325                       | peak78   | 48.64                | 250                       |
| peak29   | 15.91                | 335                       | peak79   | 48.67                | 235                       |
| peak30   | 17.70                | 275                       | peak80   | 48.96                | 325                       |
| peak31   | 18.02                | 275                       | peak81   | 49.00                | 235                       |
| peak32   | 19.37                | 300                       | peak82   | 49.31                | 235                       |
| peak33   | 19.60                | 335                       | peak83   | 51.20                | 275                       |
| peak34   | 19.90                | 250                       | peak84   | 51.77                | 275                       |
| peak35   | 20.84                | 325                       | peak85   | 52.27                | 275                       |
| peak36   | 21.15                | 325                       | peak86   | 53.25                | 250                       |
| peak37   | 21.87                | 275                       | peak87   | 53.31                | 275                       |
| peak38   | 22.53                | 250                       | peak88   | 54.05                | 325                       |
| peak39   | 22.65                | 275                       | peak89   | 54.09                | 250                       |
| peak40   | 23.69                | 310                       | peak90   | 54.57                | 325                       |
| peak41   | 24.10                | 325                       | peak91   | 55.25                | 325                       |
| peak42   | 25.11                | 250                       | peak92   | 55.59                | 325                       |
| peak43   | 25.79                | 310                       | peak93   | 56.23                | 325                       |
| peak44   | 26.29                | 250                       | peak94   | 56.39                | 325                       |
| peak45   | 28.80                | 250                       | peak95   | 57.04                | 325                       |
| peak46   | 29.12                | 310                       | peak96   | 57.31                | 325                       |
| peak47   | 32.00                | 250                       | peak97   | 57.76                | 325                       |
| peak48   | 33.22                | 310                       | peak98   | 58.00                | 325                       |
| peak49   | 33.69                | 325                       | peak99   | 60.23                | 325                       |
| peak50   | 34.01                | 325                       | peak100  | 60.49                | 325                       |

Peak 10: prim-O-glucosyl-cimifugin, peak 19: Cimifugin, peak 21: umbelliferone, peak 34: sec-O-glucosyl-hamaudol, peak 42: psoralen, peak 44: xanthotoxin, peak 46: bergapten, peak 48: oxypeucedanin, peak 57: imperatorinpeak, peak 66: decursin, peak 73: praeruptorin A, 92: praeruptorin B, peak 98: praeruptorin C.

Table S3. Intra- and interday precisions of profiling peaks in *Peucedanum japonicum* sample (PJ11)

| Peak No. | Intraday precision ( $n = 3$ ) |         |                    |         | Interday precision ( $n = 3 \times 3$ ) |         |                    |         |
|----------|--------------------------------|---------|--------------------|---------|-----------------------------------------|---------|--------------------|---------|
|          | Retention time (min)           |         | Absolute peak area |         | Retention time (min)                    |         | Absolute peak area |         |
|          | AVR                            | RSD (%) | AVR                | RSD (%) | AVR                                     | RSD (%) | AVR                | RSD (%) |
| Peak 2   | 6.33                           | 0.09    | 61.73              | 1.51    | 6.33                                    | 0.05    | 60.87              | 0.96    |
| Peak 3   | 6.81                           | 0.18    | 203.53             | 2.25    | 6.80                                    | 0.09    | 200.70             | 0.23    |
| Peak 4   | 7.27                           | 0.12    | 380.73             | 0.77    | 7.26                                    | 0.06    | 379.00             | 0.20    |
| Peak 6   | 8.52                           | 0.08    | 83.97              | 1.59    | 8.52                                    | 0.04    | 83.27              | 0.25    |
| Peak 9   | 9.25                           | 0.07    | 19.63              | 0.78    | 9.25                                    | 0.05    | 19.53              | 0.30    |
| Peak 14  | 11.31                          | 0.06    | 8.37               | 1.38    | 11.31                                   | 0.06    | 8.17               | 1.87    |
| Peak 16  | 11.82                          | 0.04    | 72.70              | 0.41    | 11.82                                   | 0.01    | 72.53              | 0.21    |
| Peak 17  | 12.38                          | 0.04    | 19.93              | 2.47    | 12.37                                   | 0.01    | 19.87              | 1.05    |
| Peak 23  | 13.80                          | 0.05    | 115.60             | 0.69    | 13.79                                   | 0.01    | 115.03             | 0.22    |
| Peak 36  | 21.18                          | 0.02    | 13.13              | 0.44    | 21.18                                   | 0.02    | 13.00              | 0.77    |
| Peak 42  | 25.14                          | 0.01    | 8.85               | 0.52    | 25.13                                   | 0.02    | 8.73               | 2.32    |
| Peak 44  | 26.33                          | 0.01    | 16.67              | 1.25    | 26.32                                   | 0.02    | 16.73              | 0.91    |
| Peak 46  | 29.14                          | 0.01    | 17.70              | 0.98    | 29.13                                   | 0.02    | 17.53              | 0.66    |
| Peak 47  | 32.05                          | 0.01    | 105.43             | 0.90    | 32.05                                   | 0.01    | 104.97             | 0.22    |
| Peak 48  | 33.26                          | 0.02    | 10.03              | 3.89    | 33.26                                   | 0.01    | 8.80               | 2.53    |
| Peak 51  | 34.65                          | 0.02    | 42.87              | 0.88    | 34.65                                   | 0.01    | 42.80              | 0.23    |
| Peak 64  | 43.27                          | 0.03    | 57.47              | 2.02    | 43.28                                   | 0.03    | 56.90              | 0.35    |
| Peak 69  | 45.03                          | 0.03    | 562.17             | 1.03    | 45.04                                   | 0.03    | 558.77             | 0.10    |
| Peak 71  | 45.33                          | 0.03    | 306.50             | 1.16    | 45.34                                   | 0.03    | 304.27             | 0.05    |
| Peak 72  | 45.95                          | 0.02    | 54.70              | 1.93    | 45.96                                   | 0.03    | 53.97              | 0.21    |
| Peak 76  | 47.87                          | 0.02    | 1021.80            | 0.77    | 47.89                                   | 0.03    | 1017.20            | 0.07    |
| Peak 78  | 48.72                          | 0.02    | 79.30              | 0.55    | 48.74                                   | 0.04    | 79.40              | 0.70    |
| Peak 88  | 54.09                          | 0.02    | 778.43             | 0.75    | 54.10                                   | 0.04    | 776.77             | 0.29    |
| Peak 90  | 54.67                          | 0.02    | 84.90              | 0.74    | 54.68                                   | 0.04    | 85.53              | 1.17    |
| Peak 91  | 55.29                          | 0.02    | 120.20             | 0.87    | 55.30                                   | 0.04    | 120.67             | 0.70    |
| Peak 92  | 55.70                          | 0.02    | 383.30             | 0.86    | 55.70                                   | 0.04    | 382.97             | 0.34    |
| Peak 93  | 56.34                          | 0.02    | 194.53             | 1.18    | 56.35                                   | 0.04    | 196.10             | 0.84    |
| Peak 95  | 57.15                          | 0.02    | 645.67             | 0.85    | 57.16                                   | 0.04    | 644.03             | 0.29    |
| Peak 96  | 57.42                          | 0.02    | 226.57             | 0.74    | 57.42                                   | 0.04    | 225.13             | 0.18    |
| Peak 97  | 57.88                          | 0.02    | 467.97             | 0.88    | 57.88                                   | 0.04    | 464.80             | 0.28    |
| Peak 99  | 60.42                          | 0.03    | 340.33             | 0.74    | 60.43                                   | 0.04    | 338.13             | 0.12    |
| Peak 100 | 60.64                          | 0.03    | 326.90             | 0.88    | 60.64                                   | 0.04    | 325.47             | 0.26    |

Peak 42: psoralen, peak 44: xanthotoxin, peak 46: bergapten, peak 48: oxypeucedanin, peak 92: praeruptorin B

Table S4. Pearson's correlation coefficients among the samples

|      | PJ01   | PJ02   | PJ03   | PJ04   | PJ05   | PJ06   | PJ07   | PJ08   | PJ09   | PJ10   | PJ11   | PJ12   | PJ13   | PJ14   | PJ15   | PJ16   | PP01   | PP02   | PP03   | PP04   |
|------|--------|--------|--------|--------|--------|--------|--------|--------|--------|--------|--------|--------|--------|--------|--------|--------|--------|--------|--------|--------|
| PJ01 | 1.000  |        |        |        |        |        |        |        |        |        |        |        |        |        |        |        |        |        |        |        |
| PJ02 | 0.930  | 1.000  |        |        |        |        |        |        |        |        |        |        |        |        |        |        |        |        |        |        |
| PJ03 | 0.991  | 0.939  | 1.000  |        |        |        |        |        |        |        |        |        |        |        |        |        |        |        |        |        |
| PJ04 | 0.904  | 0.956  | 0.941  | 1.000  |        |        |        |        |        |        |        |        |        |        |        |        |        |        |        |        |
| PJ05 | 0.935  | 0.974  | 0.946  | 0.962  | 1.000  |        |        |        |        |        |        |        |        |        |        |        |        |        |        |        |
| PJ06 | 0.969  | 0.974  | 0.979  | 0.958  | 0.963  | 1.000  |        |        |        |        |        |        |        |        |        |        |        |        |        |        |
| PJ07 | 0.963  | 0.959  | 0.982  | 0.966  | 0.969  | 0.971  | 1.000  |        |        |        |        |        |        |        |        |        |        |        |        |        |
| PJ08 | 0.918  | 0.939  | 0.944  | 0.978  | 0.975  | 0.936  | 0.967  | 1.000  |        |        |        |        |        |        |        |        |        |        |        |        |
| PJ09 | 0.962  | 0.973  | 0.977  | 0.979  | 0.983  | 0.978  | 0.989  | 0.984  | 1.000  |        |        |        |        |        |        |        |        |        |        |        |
| PJ10 | 0.932  | 0.975  | 0.952  | 0.973  | 0.988  | 0.968  | 0.970  | 0.978  | 0.986  | 1.000  |        |        |        |        |        |        |        |        |        |        |
| PJ11 | 0.941  | 0.951  | 0.961  | 0.973  | 0.983  | 0.956  | 0.978  | 0.991  | 0.988  | 0.985  | 1.000  |        |        |        |        |        |        |        |        |        |
| PJ12 | 0.903  | 0.973  | 0.935  | 0.981  | 0.955  | 0.960  | 0.969  | 0.954  | 0.975  | 0.966  | 0.957  | 1.000  |        |        |        |        |        |        |        |        |
| PJ13 | 0.936  | 0.937  | 0.963  | 0.973  | 0.963  | 0.944  | 0.986  | 0.986  | 0.985  | 0.965  | 0.987  | 0.965  | 1.000  |        |        |        |        |        |        |        |
| PJ14 | 0.910  | 0.975  | 0.934  | 0.962  | 0.976  | 0.954  | 0.966  | 0.961  | 0.974  | 0.991  | 0.970  | 0.976  | 0.958  | 1.000  |        |        |        |        |        |        |
| PJ15 | 0.916  | 0.982  | 0.942  | 0.985  | 0.976  | 0.974  | 0.968  | 0.963  | 0.981  | 0.981  | 0.968  | 0.990  | 0.960  | 0.978  | 1.000  |        |        |        |        |        |
| PJ16 | 0.954  | 0.920  | 0.951  | 0.874  | 0.903  | 0.969  | 0.918  | 0.849  | 0.914  | 0.913  | 0.888  | 0.881  | 0.863  | 0.897  | 0.907  | 1.000  |        |        |        |        |
| PP01 | 0.255  | 0.212  | 0.250  | 0.189  | 0.223  | 0.262  | 0.214  | 0.179  | 0.206  | 0.231  | 0.204  | 0.177  | 0.189  | 0.227  | 0.189  | 0.321  | 1.000  |        |        |        |
| PP02 | 0.020  | 0.002  | 0.022  | 0.010  | 0.008  | 0.015  | 0.014  | 0.012  | 0.012  | 0.013  | 0.012  | 0.004  | 0.015  | 0.011  | 0.002  | 0.020  | 0.217  | 1.000  |        |        |
| PP03 | 0.041  | 0.026  | 0.042  | 0.024  | 0.030  | 0.044  | 0.030  | 0.021  | 0.027  | 0.037  | 0.026  | 0.020  | 0.024  | 0.036  | 0.021  | 0.062  | 0.378  | 0.984  | 1.000  |        |
| PP04 | 0.020  | 0.013  | 0.020  | 0.006  | 0.021  | 0.026  | 0.016  | 0.000  | 0.007  | 0.017  | 0.004  | 0.001  | 0.003  | 0.017  | 0.004  | 0.043  | 0.359  | 0.971  | 0.986  | 1.000  |
| PP05 | 0.007  | -0.007 | 0.009  | -0.001 | -0.002 | 0.005  | 0.001  | -0.001 | -0.001 | 0.003  | -0.001 | -0.006 | 0.001  | 0.001  | -0.006 | 0.012  | 0.228  | 0.998  | 0.987  | 0.975  |
| PP06 | 0.065  | 0.045  | 0.064  | 0.037  | 0.050  | 0.068  | 0.048  | 0.033  | 0.043  | 0.056  | 0.042  | 0.033  | 0.038  | 0.056  | 0.036  | 0.095  | 0.450  | 0.965  | 0.995  | 0.981  |
| PP07 | 0.014  | -0.004 | 0.016  | 0.006  | 0.002  | 0.008  | 0.009  | 0.009  | 0.007  | 0.007  | 0.008  | 0.001  | 0.012  | 0.005  | -0.001 | 0.010  | 0.180  | 0.998  | 0.977  | 0.963  |
| PP08 | 0.033  | 0.022  | 0.032  | 0.013  | 0.025  | 0.039  | 0.020  | 0.008  | 0.017  | 0.030  | 0.015  | 0.011  | 0.011  | 0.031  | 0.014  | 0.063  | 0.358  | 0.981  | 0.996  | 0.986  |
| PP09 | 0.022  | 0.010  | 0.022  | 0.005  | 0.012  | 0.026  | 0.010  | 0.001  | 0.008  | 0.019  | 0.007  | 0.003  | 0.004  | 0.019  | 0.005  | 0.047  | 0.322  | 0.988  | 0.996  | 0.982  |
| PP10 | 0.094  | 0.068  | 0.093  | 0.060  | 0.074  | 0.098  | 0.072  | 0.055  | 0.068  | 0.082  | 0.066  | 0.054  | 0.061  | 0.081  | 0.058  | 0.130  | 0.557  | 0.922  | 0.972  | 0.953  |
| PP11 | 0.068  | 0.056  | 0.065  | 0.036  | 0.056  | 0.082  | 0.046  | 0.025  | 0.043  | 0.065  | 0.039  | 0.035  | 0.029  | 0.068  | 0.041  | 0.124  | 0.545  | 0.912  | 0.964  | 0.950  |
| PP12 | 0.051  | 0.032  | 0.050  | 0.025  | 0.037  | 0.056  | 0.035  | 0.020  | 0.030  | 0.043  | 0.028  | 0.021  | 0.024  | 0.043  | 0.024  | 0.083  | 0.489  | 0.953  | 0.990  | 0.977  |
| PP13 | 0.085  | 0.061  | 0.085  | 0.056  | 0.065  | 0.086  | 0.068  | 0.053  | 0.063  | 0.074  | 0.061  | 0.051  | 0.059  | 0.073  | 0.052  | 0.111  | 0.418  | 0.971  | 0.994  | 0.979  |
| PP14 | 0.028  | 0.013  | 0.029  | 0.015  | 0.018  | 0.029  | 0.019  | 0.013  | 0.017  | 0.024  | 0.016  | 0.011  | 0.016  | 0.023  | 0.011  | 0.043  | 0.273  | 0.995  | 0.991  | 0.978  |
| PP15 | 0.007  | -0.002 | 0.007  | -0.005 | 0.000  | 0.011  | -0.001 | -0.008 | -0.003 | 0.005  | -0.005 | -0.007 | -0.006 | 0.006  | -0.006 | 0.026  | 0.271  | 0.994  | 0.993  | 0.981  |
| PP16 | 0.011  | -0.004 | 0.013  | 0.004  | 0.003  | 0.007  | 0.008  | 0.005  | 0.004  | 0.004  | 0.004  | -0.003 | 0.009  | 0.002  | -0.004 | 0.009  | 0.207  | 0.997  | 0.980  | 0.974  |
| PP17 | 0.020  | 0.009  | 0.022  | 0.011  | 0.013  | 0.023  | 0.012  | 0.008  | 0.012  | 0.019  | 0.011  | 0.007  | 0.010  | 0.019  | 0.007  | 0.036  | 0.307  | 0.994  | 0.996  | 0.981  |
| PP18 | 0.026  | 0.010  | 0.029  | 0.016  | 0.016  | 0.024  | 0.020  | 0.018  | 0.018  | 0.022  | 0.018  | 0.011  | 0.020  | 0.020  | 0.010  | 0.030  | 0.302  | 0.993  | 0.992  | 0.976  |
| PP19 | 0.034  | 0.014  | 0.036  | 0.022  | 0.021  | 0.029  | 0.027  | 0.024  | 0.024  | 0.026  | 0.024  | 0.016  | 0.028  | 0.024  | 0.014  | 0.034  | 0.263  | 0.998  | 0.990  | 0.975  |
| PP20 | 0.047  | 0.022  | 0.050  | 0.033  | 0.030  | 0.038  | 0.040  | 0.038  | 0.037  | 0.036  | 0.037  | 0.025  | 0.042  | 0.032  | 0.023  | 0.041  | 0.284  | 0.992  | 0.987  | 0.971  |
| PP21 | 0.020  | 0.010  | 0.020  | 0.006  | 0.013  | 0.025  | 0.010  | 0.002  | 0.008  | 0.019  | 0.007  | 0.004  | 0.004  | 0.020  | 0.006  | 0.043  | 0.309  | 0.989  | 0.994  | 0.980  |
| PP22 | -0.045 | -0.049 | -0.042 | -0.040 | -0.047 | -0.046 | -0.044 | -0.040 | -0.043 | -0.043 | -0.043 | -0.042 | -0.040 | -0.043 | -0.045 | -0.047 | 0.021  | 0.977  | 0.930  | 0.921  |
| PP23 | 0.068  | 0.049  | 0.068  | 0.045  | 0.056  | 0.073  | 0.051  | 0.041  | 0.049  | 0.062  | 0.048  | 0.039  | 0.044  | 0.061  | 0.043  | 0.097  | 0.498  | 0.950  | 0.988  | 0.970  |
| PP24 | 0.041  | 0.028  | 0.041  | 0.022  | 0.032  | 0.047  | 0.029  | 0.017  | 0.025  | 0.037  | 0.023  | 0.019  | 0.020  | 0.037  | 0.021  | 0.069  | 0.370  | 0.982  | 0.998  | 0.989  |
| PP25 | 0.047  | 0.031  | 0.045  | 0.020  | 0.034  | 0.053  | 0.030  | 0.014  | 0.026  | 0.041  | 0.024  | 0.018  | 0.018  | 0.042  | 0.021  | 0.083  | 0.416  | 0.968  | 0.994  | 0.981  |
| PP26 | -0.054 | -0.055 | -0.052 | -0.050 | -0.055 | -0.054 | -0.051 | -0.053 | -0.054 | -0.057 | -0.057 | -0.051 | -0.051 | -0.057 | -0.054 | -0.058 | -0.034 | -0.017 | -0.023 | -0.015 |
| PP27 | 0.029  | 0.008  | 0.028  | 0.008  | 0.021  | 0.026  | 0.032  | 0.009  | 0.026  | 0.021  | 0.012  | 0.010  | 0.027  | 0.023  | 0.013  | 0.050  | 0.170  | 0.023  | 0.050  | 0.046  |
| AD01 | 0.104  | 0.074  | 0.106  | 0.056  | 0.071  | 0.106  | 0.114  | 0.017  | 0.068  | 0.079  | 0.056  | 0.070  | 0.036  | 0.091  | 0.102  | 0.206  | -0.057 | -0.034 | -0.044 | -0.045 |



|      |        |        |        |        |        |        |        |        |        |        |        |        |        |        |        |        |        |        |        |        |
|------|--------|--------|--------|--------|--------|--------|--------|--------|--------|--------|--------|--------|--------|--------|--------|--------|--------|--------|--------|--------|
| AD02 | 0.403  | 0.539  | 0.434  | 0.497  | 0.495  | 0.510  | 0.489  | 0.419  | 0.470  | 0.529  | 0.447  | 0.537  | 0.414  | 0.569  | 0.561  | 0.556  | 0.087  | -0.018 | 0.002  | -0.003 |
| AD03 | 0.349  | 0.441  | 0.372  | 0.400  | 0.407  | 0.431  | 0.418  | 0.327  | 0.385  | 0.433  | 0.364  | 0.438  | 0.334  | 0.471  | 0.467  | 0.502  | 0.060  | -0.021 | -0.006 | -0.011 |
| AD04 | 0.326  | 0.377  | 0.340  | 0.333  | 0.353  | 0.386  | 0.376  | 0.267  | 0.329  | 0.369  | 0.312  | 0.370  | 0.283  | 0.404  | 0.404  | 0.481  | 0.075  | -0.016 | 0.000  | -0.003 |
| AD05 | 0.309  | 0.359  | 0.326  | 0.320  | 0.335  | 0.366  | 0.365  | 0.255  | 0.316  | 0.351  | 0.298  | 0.359  | 0.274  | 0.387  | 0.389  | 0.456  | 0.042  | -0.021 | -0.011 | -0.014 |
| AD06 | 0.445  | 0.597  | 0.478  | 0.564  | 0.559  | 0.563  | 0.543  | 0.482  | 0.525  | 0.583  | 0.504  | 0.598  | 0.474  | 0.623  | 0.622  | 0.591  | 0.102  | -0.019 | 0.004  | 0.005  |
| AD07 | 0.373  | 0.494  | 0.404  | 0.462  | 0.454  | 0.467  | 0.456  | 0.391  | 0.436  | 0.486  | 0.415  | 0.497  | 0.385  | 0.521  | 0.524  | 0.507  | -0.022 | -0.031 | -0.033 | -0.040 |
| SD01 | -0.104 | -0.110 | -0.098 | -0.093 | -0.106 | -0.104 | -0.100 | -0.093 | -0.100 | -0.100 | -0.102 | -0.097 | -0.093 | -0.099 | -0.103 | -0.107 | -0.052 | -0.034 | -0.044 | -0.043 |
| SD02 | -0.122 | -0.115 | -0.115 | -0.104 | -0.106 | -0.119 | -0.103 | -0.107 | -0.116 | -0.117 | -0.118 | -0.113 | -0.106 | -0.118 | -0.116 | -0.129 | -0.061 | -0.033 | -0.046 | -0.021 |
| SD03 | -0.085 | -0.091 | -0.080 | -0.077 | -0.086 | -0.086 | -0.082 | -0.077 | -0.083 | -0.082 | -0.084 | -0.080 | -0.077 | -0.081 | -0.085 | -0.087 | -0.043 | -0.026 | -0.032 | -0.029 |
| SD04 | -0.097 | -0.103 | -0.091 | -0.088 | -0.099 | -0.096 | -0.094 | -0.089 | -0.095 | -0.093 | -0.096 | -0.092 | -0.088 | -0.092 | -0.097 | -0.098 | -0.042 | -0.031 | -0.037 | -0.035 |
| SD05 | -0.144 | -0.120 | -0.136 | -0.125 | -0.119 | -0.136 | -0.123 | -0.126 | -0.136 | -0.138 | -0.137 | -0.130 | -0.125 | -0.140 | -0.132 | -0.155 | -0.079 | -0.044 | -0.060 | -0.031 |
| SD06 | -0.110 | -0.119 | -0.104 | -0.100 | -0.114 | -0.111 | -0.107 | -0.099 | -0.107 | -0.106 | -0.108 | -0.104 | -0.099 | -0.105 | -0.111 | -0.112 | -0.039 | -0.030 | -0.043 | -0.044 |
| SD07 | -0.079 | -0.086 | -0.075 | -0.072 | -0.083 | -0.080 | -0.078 | -0.072 | -0.078 | -0.076 | -0.079 | -0.075 | -0.072 | -0.076 | -0.080 | -0.081 | -0.040 | -0.030 | -0.035 | -0.039 |
| SD08 | -0.096 | -0.103 | -0.090 | -0.087 | -0.099 | -0.096 | -0.093 | -0.086 | -0.093 | -0.092 | -0.094 | -0.090 | -0.086 | -0.091 | -0.096 | -0.098 | -0.050 | -0.037 | -0.044 | -0.045 |
| SD09 | -0.103 | -0.110 | -0.097 | -0.093 | -0.106 | -0.103 | -0.099 | -0.093 | -0.100 | -0.099 | -0.101 | -0.097 | -0.092 | -0.099 | -0.103 | -0.107 | -0.053 | -0.038 | -0.046 | -0.046 |
| SD10 | -0.095 | -0.101 | -0.089 | -0.084 | -0.095 | -0.094 | -0.089 | -0.084 | -0.092 | -0.091 | -0.092 | -0.089 | -0.084 | -0.090 | -0.094 | -0.098 | -0.057 | -0.040 | -0.045 | -0.042 |

(Continued)

|      | PP05  | PP06  | PP07  | PP08  | PP09  | PP10  | PP11 | PP12 | PP13 | PP14 | PP15 | PP16 | PP17 | PP18 | PP19 | PP20 | PP21 | PP22 | PP23 | PP24 |
|------|-------|-------|-------|-------|-------|-------|------|------|------|------|------|------|------|------|------|------|------|------|------|------|
| PJ01 |       |       |       |       |       |       |      |      |      |      |      |      |      |      |      |      |      |      |      |      |
| PJ02 |       |       |       |       |       |       |      |      |      |      |      |      |      |      |      |      |      |      |      |      |
| PJ03 |       |       |       |       |       |       |      |      |      |      |      |      |      |      |      |      |      |      |      |      |
| PJ04 |       |       |       |       |       |       |      |      |      |      |      |      |      |      |      |      |      |      |      |      |
| PJ05 |       |       |       |       |       |       |      |      |      |      |      |      |      |      |      |      |      |      |      |      |
| PJ06 |       |       |       |       |       |       |      |      |      |      |      |      |      |      |      |      |      |      |      |      |
| PJ07 |       |       |       |       |       |       |      |      |      |      |      |      |      |      |      |      |      |      |      |      |
| PJ08 |       |       |       |       |       |       |      |      |      |      |      |      |      |      |      |      |      |      |      |      |
| PJ09 |       |       |       |       |       |       |      |      |      |      |      |      |      |      |      |      |      |      |      |      |
| PJ10 |       |       |       |       |       |       |      |      |      |      |      |      |      |      |      |      |      |      |      |      |
| PJ11 |       |       |       |       |       |       |      |      |      |      |      |      |      |      |      |      |      |      |      |      |
| PJ12 |       |       |       |       |       |       |      |      |      |      |      |      |      |      |      |      |      |      |      |      |
| PJ13 |       |       |       |       |       |       |      |      |      |      |      |      |      |      |      |      |      |      |      |      |
| PJ14 |       |       |       |       |       |       |      |      |      |      |      |      |      |      |      |      |      |      |      |      |
| PJ15 |       |       |       |       |       |       |      |      |      |      |      |      |      |      |      |      |      |      |      |      |
| PJ16 |       |       |       |       |       |       |      |      |      |      |      |      |      |      |      |      |      |      |      |      |
| PP01 |       |       |       |       |       |       |      |      |      |      |      |      |      |      |      |      |      |      |      |      |
| PP02 |       |       |       |       |       |       |      |      |      |      |      |      |      |      |      |      |      |      |      |      |
| PP03 |       |       |       |       |       |       |      |      |      |      |      |      |      |      |      |      |      |      |      |      |
| PP04 |       |       |       |       |       |       |      |      |      |      |      |      |      |      |      |      |      |      |      |      |
| PP05 | 1.000 |       |       |       |       |       |      |      |      |      |      |      |      |      |      |      |      |      |      |      |
| PP06 | 0.968 | 1.000 |       |       |       |       |      |      |      |      |      |      |      |      |      |      |      |      |      |      |
| PP07 | 0.998 | 0.954 | 1.000 |       |       |       |      |      |      |      |      |      |      |      |      |      |      |      |      |      |
| PP08 | 0.983 | 0.994 | 0.973 | 1.000 |       |       |      |      |      |      |      |      |      |      |      |      |      |      |      |      |
| PP09 | 0.989 | 0.990 | 0.982 | 0.998 | 1.000 |       |      |      |      |      |      |      |      |      |      |      |      |      |      |      |
| PP10 | 0.925 | 0.988 | 0.905 | 0.970 | 0.963 | 1.000 |      |      |      |      |      |      |      |      |      |      |      |      |      |      |



[illegible]

|      |        |        |        |        |        |        |        |        |        |        |       |       |       |       |       |       |       |       |       |       |
|------|--------|--------|--------|--------|--------|--------|--------|--------|--------|--------|-------|-------|-------|-------|-------|-------|-------|-------|-------|-------|
| SD06 | -0.043 | 0.023  | -0.033 | -0.050 | -0.053 | -0.047 | -0.044 | -0.048 | -0.060 | -0.055 | 0.968 | 0.760 | 0.888 | 0.746 | 0.815 | 1.000 |       |       |       |       |
| SD07 | -0.033 | -0.003 | -0.030 | -0.048 | -0.052 | -0.049 | -0.044 | -0.046 | -0.057 | -0.053 | 0.720 | 0.868 | 0.797 | 0.969 | 0.666 | 0.607 | 1.000 |       |       |       |
| SD08 | -0.042 | -0.003 | -0.037 | -0.061 | -0.065 | -0.061 | -0.055 | -0.057 | -0.070 | -0.065 | 0.906 | 0.899 | 0.929 | 0.982 | 0.792 | 0.822 | 0.925 | 1.000 |       |       |
| SD09 | -0.045 | 0.005  | -0.038 | -0.060 | -0.065 | -0.061 | -0.055 | -0.057 | -0.070 | -0.065 | 0.914 | 0.908 | 0.917 | 0.973 | 0.815 | 0.849 | 0.909 | 0.982 | 1.000 |       |
| SD10 | -0.044 | -0.018 | -0.038 | -0.061 | -0.069 | -0.066 | -0.059 | -0.060 | -0.071 | -0.067 | 0.415 | 0.401 | 0.457 | 0.407 | 0.330 | 0.363 | 0.388 | 0.425 | 0.408 | 1.000 |
